# Supplementary material
Source: PubMed Central journal article supplement (PMC4342549)
Supplement: NIHMS62122-supplement-supplementary_4.pdf [file NIHMS62122-supplement-supplementary_4.pdf]

## SUPPLEMENTARY MATERIAL 2

### Taxon abbreviations/Database:

Co: *Capsaspora owczarzaki* (BROAD INSTITUTE-Origins of Multicellularity)

Mb: *Monosiga brevicollis* (JGI)

Ac: *Acanthamoeba castellanii* (own assembly)

Am: *Allomyces macrogynus* (own assembly)

Ap: *Amoebidium parasiticum* (NCBI scaffolds)

Tt: *Thecamonas trahens* (own assembly)

Sp: *Spyzellomyces punctatus* (BROAD INSTITUTE-Origins of Multicellularity)

### Rel/NFkappaβ

>Co\_NFkappaB GU985464 (predicted CAOG\_01632)

```
MDLSELSGWDPNLSLQEHETANLLAMDDSTMAAMILHSDGLSLFRDMGLYNSVSTSLDISGIPKFPFPPQO
PQLAQAPRRGHNSSSSSDSHSTPSPGVSFLFSPSPASQDMSLQSPGLVGLTGNRLASTSEADDILLA
NILGHPVRSVSANTSMVGLPDDLGFSPPTGMDLITITATSPATADSSASATAFPAASPIASPSVSTSSGPV
TVGGTSAALAAALTPDRINRLLSAAEAAAEGAATLVEDLLMVTEEPAQFARFRYMSEQRERSLAGENSFPT
LMVNPKYARVVPPEMALVTAVLVTKMPDPHTGRQQKHWHHLGGI PAAPLEGPQRIARFDNIAVIMDKANNK
DKDKSKAPVRSKDDQRCVRIMFELVVFVSGNTQFYGRAISQPIYNAKLAI TKISHSSGPVTGGNEVIMLCS
KIRKGVTVGVRMTDPTQWSVQAPSGSAWELNPTLKADCNVPGANLFFHHQYAVVLTLPPTYHTQTITAPVT
VRISILDTDDETESQYVEYTYLPAEAAVRNAELAARKRRRDDSMRDFMDFDGS DGGNGSGSGRGNNGGH
DGS DANNGRGGGGSSSSSKGGDEPFNFNSLIPMHQHKLHQLALSTVRAVQGF AASGDARYLLALHRQLL
AAPNENGDSPLHTAVAQGNLRSTMALLPLLAEDLQSVNDMGETVLHSAVIEKRAAIARLLL VAGADLGO
SNARNFNRLSLHYLARHGDRATAMAVFGVFGSAQAPPANTNTPAQAPAGETKPKPADLRLLLARIQAQAIK
ALLACELETGATPAHLAIRGGHWHVFEACAKLAASAPIPKAAGSLLSMVAEKSSGHSLLHSCVLANNEQA
VRL LINLGASGNARDFGKNTPLHLAARQGHIGIAALLVEAGATLSLNAVSTPLDVL TSEGSLSRDQLR
ALVAVLRGELKYADMRGRPTLRMPHAEHLSTAAALTSASPGAVSLADFYAGKKASRSPAPLGASSLLS
STGASAAGASAP TIAAVHAASATPVERTSMNND D YVLEK DAPY PVEQQPHGKR NKHSHRFRTRSSHGS
QDKDELKDKDDPKKEKEPKELSKFTLKEAFVDGTFWELTRKFAGKKKMASASTGEMEPLSPERPLSPT
NAGSGAASPFNQAKEQVSPGAVPPTGLEKLVNKLMDASEATLSSQP AEAVTPEQKLAEKLEKLG LAPAST
TSAPPPHPKVAALNAQSVEDARKTSTHALYSVD
```

### Runx

>Co\_Runx1 GU985462

```
MSLTATAAATSPISPASAVSSSTAGGAGLVGPPRRRVLQSSRSSSFSRRTTSTSSSEDVTANSEQDFPFVSS
IVSTTHPQVLCNLPEHWRCNKSLPAPFVVYAQVNVDPDDEVTVSAGNDEHAI AEMRNFATVMSNNTATF
SDLRFMGRSGRGKRLTVSITIHTTPTPIVAQLVEVIKMTVDGPRDPRRRRPGSEMIASASEDDLSDASGF
ASDLGSGTMSAEAFGSTASTGSPLSGSSQQLAPGQTPPAQPN SAGTGGSFKSHRTRSLSTTLRRCQSAPY
MAPEFRRTGSGTLLPHDKPSSPRASSNNNDLDRPRSAFPSDLADSEMQRFRSVSMGSSADSMAEDVF
SPLES PRSPSVAALYHLQHSGVSSPSPDHSLLSMESLLAPLTPAALS FNAADVVLSSGAMNLVPDFTL
VLSVYEAEPEGSACVATMRVGSAGQVMTDVGVMFGNAIPTLDSVNLGIDGTVQCMFKVPSRSECGASLQR
GNRLEVVGIFYKLADRVCSSNSLGF AFK DVEGAI TERQLNAV LHLHLKNQQTQLAHSEPLQKQVLGGGA
PRNLLRQLRPLEDNLFARSQAVLQCCGMQHTLNPI DLP IGPDGQISVSNVQSSGLTALHVAEFGWNKFV
TQLV TAGASINQRDNFGNTALDWA FMSDQHVTCCQLLQSAGGLFNMFAQPKVTDDLQASFOQFTLSSPVLG
QLPSPTTRIASRSRSPRPHLGSPLNFGGLSQNTSPPGQVLS EIP EAQSSAQQSYQTQLQFLQQLQHHQLV
EQEQQQKQQQLLVQLMQQQQPQLQLQQQAKQQAHHNLVQHLLSMDMSASASAGSSSRVSTSSLLSNASA
VTSAPSMPLPLDFTTTS DAHLYSEPDL LALDLPSPNPSTLSMGELHF
```

>Co\_Runx2 GU985463

```
MSIAAASPTSYS PSSGLRRTTRLRSNPHHS GNEDEDDGDYSAGKGRAKRAARPASGRGDDSD EEGDVHD
SATVSQTDNPIYIFVVGLPKHWRANKALPATFRIGIHPGYKVANGTQVILHAKNDEVGQAQIKGGMTVIQD
```

NAALFTDLRFVSRSTSRSGRGKRFDLLISILCEPPMYATVMEALKITADGPRVPRFHKEGKSPNLGLVKA  
PDTTQDSMPKPAFAPSQQRQQPMPQQQQAPPPQAQLLQQTAPQLGLQLQHPQQQQQQQQQQPQQPQQQQ  
QHPLSLNNMYALPHNPANTTPVRQRTPVPPPLASSAGSAGNMAGAAGIAMYGTQGNFLTSPGFFAGEFTPG  
FGSAITGQWLGPNPSGAGVTRGTPLPSPGLFGPQVPLQTPQGGQGMYYSTGHI PMPPQSGQMLQPPPVQQP  
QPHHLQQPQQQQPQQQQQQQQQQQQPQSQPHPHQFQPPMPPAFNVGGGHPQQQQVNSQHL  
HPPHHQQPQGHGTPLPTPMSATLHFNFASARETAMLEESANVSRCSMIVETQLTGLSQRANALNACTH  
SMLSIGSCNEALIPLNEALWNLEVREFNRLKEQTVCFAMAV

*T-box*

>Co\_Bra-like GU985459  
MTSNHFSSTNVATSAPIVVPTPSTSDVTLRSASSAAAAAALDSSDTHRYIKHVAYHNQPSAELEQPNV  
ALESSKLWAKFADATNEMIVTRTGRNMFVLRFDITNLDPNNTLYAIMLDIAPADGIRWKYVSGEWWVGGK  
SDAPTGPTMYVHPDSPKSGKYWMQRPISFSRLKLTNRPNTKGNIVLSSLHKYQPQLHIVSVPSMNAPTHG  
QPTSVHTFPETAFAIATAYQNDYIKDLKIKNNPFAKAFNLPRDRPRSSRGDDDDDDDDNDNDNDNADEHE  
EDSGSDGSLPGAGGREGGRPVTRKPPSPFKGSSSTTSGTTRTRVPSGSRSSSSSLPSSSASELHAIQGL  
RPSDLSAMPNSMHVQPPSQQLSSMQYVSPQRFVYAADSAPPPYAGQPQQQLQQGMPYGSNPTTTTTSVAFP  
AAGGEGMNGGYYQQPVSLVQSMQPGQPQSMQPIQQQPPIQQQQPIQQQQQQQQQLGQYAAQTNVLPYGGPQ  
MVDRRVFYEQQQPQLQQQQQLQQLQPLQQQQQLQPLQRQPPTSSEIGSSLDGMVTLPLASNTMPHQSM  
QMGWSWQPPSGGYYSMSGQPVSVSYSAPTMQPMTTFAQRPLMQQISQQTSPQQQHLQVVFVTSQGGGGH  
VTFTGALPAQNHQQMAFVSHVQPIPYQSMAPHAQQQLQQQQQQQHHQPLPPHQHQPPQYSTLPLPLGMVQP  
QLESQALLWLQQQPGFVNAPTQGLKRAALEAFNASESDPGAPWTKREHIDAARVE

>Co\_Dtbox GU985460  
MGERRITRSLSGSIGGGSAGAHAAFGFSMDPGIGIGSGLGFAAPVAATDANAASMTTSASPGRAGQQQQ  
QQQQQQQQQQQQREPRLSARNLALPDDRSALAGTSASSMRSAASTASSGAHAASLGALRRGGASGHSLA  
GRRGGGNNHDDTNNNRSSGDATADDADHPLAVTRNSGSAIQVSLRGEALWKRFSSENTTEMILTRNGRC  
LFPVPKIDVGGQLQPNALYSIVLEFVPANGARWKFDLVDQEWRLVGPSPRITQASYTHPDSPALGSVWNA  
SKINFNKLKITNVPNTGDHVVLNSFQMYKMVVRIDQLNPATNQPTSTVFSETLPYSSFIAVTVYQGLAMR  
ELKKSTNPHSGIQHHQSQKELLAAAAAATGTAKSKGNKRRPTGAAVASADSGSTDEEPQFREAKDDR  
AKRIRLDTQRQSPPRNGNNGNNGNNSNSNSNSNSNGLLQQSDLISGSQFDFLQNELNLFNSAFLQSGNS  
INPSASTFSLFKNAAAAALAEQAPSTSFAQPSDSTITGPNPSRMLLHNADSLRSGSSNSVLGIISSSA  
FALAAAAAHSHQLGLLSLPPSSNAPSNALEPTNGAVAAVKQEAESTTTGSAPAASSSSAAAAASAAAAQT  
SPQAQEKARLLGQRRHGRLSGAQHRGDTLAGPDNSMFAAPNSTLFGGFASFEVPPAPSAMHRTTSPPLQ  
LQNNDASPPVMSHPMTRRSITSQDGLALHQPHAPQHQAQYQQQQQQQQQLQQQQQLQQQQQQPLDQPQQ  
TQPWRSQQQLTHVFSASAQSFPSLLATFGAGGLAGSASVNASSFSLADSQPLAQWLSFADPNALPFSR  
ESVMHLSDLKGLSGLSSLGLGRRDVPMATQFGFGPIGTQFGVAPMPQPTLQQLQVRQQQFQQEQQQQQ  
QQQQQRQLQEFQFQAPYQQFGHTQQQQQPFYINQQMQTPVPAAPFYQSAPAPQQFGQESLSNSYSARGG  
FPGGFAAQPSASNLFASFSGGGLDPSMTLSANSSGGVAQFASGRRVTRSMGSSGHPPFPMESSAAPAT  
SSQTYPPAAAAQGLDQDNASGAMLTTPMGSFASNNNNMRLRPSFSSEGLPLPPPSTIGIELVGKDLWEQ  
FHQLGTEMILTCKGRCLFPHPVIRLTGLQPDAKYTVILELSPVDSTRWKYANAQWQPNGRIALPLPTLC  
THPDPSPATGEAWMAKEVSVFVRVTVNTFNETGNVLLNTFQKYVVLHFHVQVDSVTHAPRVVETRFRPETE  
FVAVTVYQNVNIRKLLKQTNPHATRDFDTEVEEDES

>Co\_Tbox3 GU985461  
MGSPLRLISMFGVHIALEKEELWRTFFRHGNEMILTCKGRRLFPTPSFTITGLPEHRFSFIVINFPASK  
VAHRYVGEAWAEVPTSKSLDCNVVTQFVHNSSPALGSVWVEHPFMDFKITNNEITSTTSDAVLLHALHK  
YIFCVQVFEPLAEDESSMLEVDLEAPAGANRMHLPGHRLVHSQLFEETQFIAVTAYCNPNI RALKISHNP  
FARAFTDRARGDIETARALTQALENQDDSSAGEASPIPVAMVGPQRAPVRRSSFGGADMLS PATTDDGTP  
LRPQFLPLCFEPERSRSAALSSAPTPTPIPTRI TARRNRTVSEMDAVDSTASLS PAHSLASRNHTPSPM  
IQQGSTAFPFTTLPASPKRARLDHSQGLRSITSLGGGARKLSFESMYSSDFSDLLLLDAQRMFSNANARN  
SGHGGLTTSASCSSMASTNSRSAGLPHLSHTYFPGSSADSTPLPTPGLGHSQTGQTPTARPRVMSISQN  
RANWDAFQHATQSANLDSANTSTVEELEG LIGAVARSAKEAAIEMMTKMHATS PQFRSSEYAHQVKLAM  
NDAKIQIVVCDLAVFTPTTLQRLRANPVSADLSLMVVVPNTLPSLIDSILASGVEDVLYEPLPPALLKQ  
HLVRCIERRSWHAYM

>Sp\_Tbox SPPG\_06782  
MHTTASSHTAVPKRKSDDDDSHESSYLIAKTRRLSNNLMSSQSGNDQQVERRPLRQGGMRTLTVPSPSL  
PHGSRQESTMRNANGPTILLEDKLAQFHSVGNEMII TKGGRCLFPTLRFRPICLDPQALYSIAIDIVQ  
TVPHKFKFKNGHWAPVSLDAGSGGESEDMLVPTCRAILHSSATQSGAFWIQQGISFAKIKLTNRCPSLLR  
SPSPGSSPDYPSVPEGYFYLN SFHQYQPRVHLIKHSAEQSVTTYLFEETKFI AVTHYQSEKVNLSLKNY

NPHAKGFKDYETKLAALRIRSGSVASTTSSGTPTTTTNDIDAIDIPTFRISVNERSGRAVVKSLPATVQRSR  
GVIRTTGNRYQIEEDEDESPYDNGQEDDQVEEDEVECSSTADTSDSDLSDSDDESTYSTTSTTSLSQVSS  
DAASPSQENQPPQSSNSSSPLQLLALFCSYILDSGNLALNPAEIVTHSETTEVQRFTLVDAYEIECKRL  
REVRNMLMSSDRECAPAMRMI

>Ap\_Tbox\_partial manually annotated  
QNVHLRQLELWTRLHQLRNEMIISSKGRQLFPPIELISIDVDPEQKYNVWLAFECEDGSGWRWVEHSGXX  
XXXXXFYLLPGGPYEGRQISTDGISFNHCKITNKPNKAAIHLESFHSYLPVGYLVPVHENSPPSQNPPVR  
NMTNFIGV

### *Churchill*

>Co\_Churchill CAOG\_05736 reannotated  
MCRNCLKEDTPARGTTCLDTGAYLVNFKGCAQCQSFEFPREQDRKVEDEDETGEETVTFTHVCKQCNHVI  
AEHNYTTFEIEDGYQEYTMECQLCGTADDTASVLPDDPRKAQTLF

>Ac\_Churchill1 manually annotated  
MCRRCLVHVCPQRDRCLSSGSYLLNFKGCGEGKMEFIKIAELEKNETETDETVTYQHQCSECSHKIAD  
HEYTFTIDGEYQEYAMNCVLCGYGEDRVSIMPDDPEKIAQYDMY

>Ac\_Churchill2\_partial manually annotated  
RARRRARWSHLIIRHRITSKLKSVAANTRDAAAKALAKKTLKLVKKFALNGCGEGKMEFIKIAELEKNE  
TETDETVTYQHQCSECSHKIADHEYTFTIDGEYQEYAMNCVLCGYGEDRVSIMPDDPEKIAQYDMY

>Tt\_Churchill MSG\_09514  
MCKDCLRSVCPDRGSMALDTGAYFANYTGCAECSVFRLAVRDKTADEDDEGNETVSFTLQ  
RLSTDVCGACEHVIALHEFSCIVDDGRHEYSMSCLLCGMAEDSRAIGVYDAGAASALT

### *P53*

>Co\_p53 CAOG\_00511  
MDKLDATNLFELLGPPSSSSSSRRALPSRTQVATAGAGAGAGAGAAAGADADSKGSHDPADLNSTLLLGD  
SRPASLRTSTSLQSIFFPNLGTPTQLFAEFGETTGTSLLNMSGLRGFNTPSSSSSHSHSHSHSNSSN  
SSFLGRPRTLVPQPLSILQSAPEPFVEPLTIGEPYASPNLGEAGFLLSVDVSNARHSAISSAYSYS  
EALGTLFTNFVGVFVFRVAKPPPTVHPLHIRATLRYKMQFMKEPVRRCPHLHSIDSDLHLLRACDQD  
TVYSVDYHGRASIAVPFPTMQPLVPVLINTLKDAHVPLVTRHPSSTHGEASRSNPYVCWSMTWFLKFC  
YTSTCTGGMNRRATEIVFTLEDSQGLIYGAQALDFRTCASPSRDRKQLEKSPPIPVGSIIPPEVVTAHQG  
SALADPGTTASTPTRRSAQPVVPSPVVAASPTPAPGLLSSGRKAGAI PVTGVTPRPLVVI PAASSAQTAP  
TAPAAAAAAPSALTEAHAAPTLLRDRSITAIKRRHADDDDEIFTISIRGRDNFVLVSKIVEGLNALA  
QRTSAAVASKLERTTTPPVVEDDPSAPPALSALDTLAQAAAGHVRAPEAAPATHERKRARLADDDTKAG  
RATEASGESISTWLGSFGLKQYAVNFAKNGYTNPQIILNLCEDDLKSIVRVKAHRVRIAAAIDELADAQA  
EPTSTPPMSSDGDVTVVRMTIRRRTSSSTAK

### *Stat*

>Co\_STAT CAOG\_04636  
MAEAAATPTRWSSIETHPEATAIYGRDFPLELRHYFAQWIEDQPWATMDPDNPEHYESI KDRVQTLGEML  
HAKISQLAASGSEDKFLLQMRLOTIAADATFDENPTVLVRI LKTCMERELIVAKLHGLESSGLEASGMQ  
LLDGMSAISALAAALPQSAPEAHERDDISFLMMGPSSTSRSSVPVALNSSSSLLGSLPHVEGGARALAVEV  
SDASGAAAHQLAECVRIA AHKAQATLHHLVGDQHVDELKRLQMQEYFVIQYQEFQQLQAVLQRSPRS  
DAARGQIELVKRRKQEVGTTLSTEANNI IALMQSLNRQLQANMGDIAELQTLVLPDALQAWQRAQRLES  
DADQLDSVQATCEMIAEALWRSREQTRALLLQTLQPLFDRKSYHQPVQQSGSHTPFVAQLNSHSPHHARN  
SSSHHHMDTATPASSTSPVNSSPQATLSRPRGKSRSSLSASASPAGLSSMSISSGNSAGGMSNSSAA  
AMDTEGATNTAASISSNGMVSLEDLHIRATQMLASLIGATFVVETQPPQALKTQSKFSAQVRLLVGRTL  
LHMSPEVLTIIISEAQAKVAQPPAVTVTDGKRASQPTSIPEDFNAGDILNCRKAMECHQPSGALRVIF  
KNLSLKKIKRGSNKDETVTDEKFAALLFQSTFSVGGGELLVAVRTLSLPCVVIHNNQQHS AEATILWDNS  
FATMDRAPFEVPEVVSWPDMLTALQHHSFSLATQQPLSQRDLEYLTKASDLI INESITWKRLTKEALPDR  
TFTFDWDFGAEDVIKRHMLETWQDGLIMGFCNKQQAHDLLINCVPGTFLLRFS DSEIGGLTVAVITEDE  
RGMQRQVFNLHPWFAKDFAIRALADRIHDLPLQLQFLFPDTPKDAVFGRHYSVETAHVTSNNPDYVRSSIAA

VIPGSVPSFTMPIVNDQFLMKADSSSSMMHPTSSNLLDLVGMGMVGMVGDADAGQMSLWDSTFLESLE  
EPIPQLQHDGI

>Tt\_STAT1 MSG\_03678

MAKIAEKINSLALSPNQDAYILKIRLEEIAVALEAKYASDPLELVRVILYVLGHEREILETGGTKTKFAM  
HSSFSSTSYGMDVSKLNDASLNAEIQKLOEHTAETEAALQQLQDQEYLVIWHDWDELNARAQAASGA  
QAKALAAECHTLRGNIMQAQEGILRTRREILEAHVGAITHSEQVLSILLAKLKQWKAVQRKQTMDESFLN  
DVLNMQLOQFESLADVYWNIRHQLRQHEVQEQLDGCDENESAVFDQLSTQLHAQLETLLRASVIVEQP  
PQVMKTSTKFSAAARILVGGKLNMLSPPEVNLQLVNEPQATALVNDDELIGNSGDLLNGKQMMAYSEST  
RTLQATFKNLSLKKIRRHSAKKEVVTEEKLALIFVTSVQLGDLTYNLWTMSVPPVVIVHNNQLVRATATV  
FWDNSFGKTRALWEVDPDAVRWPKFAAGLNHFFTLANGRPLTPDALNFLGSKLLEPGEDTVEWRTFSKDN  
LRNRSFTFWWFYIAIVELVRKHLAGPWIDGLVVGFSKSAASEALMHQPRGTFLMRFSDSELGGVSVSWN  
VVDGATGTSKVYNLQPFKDLAIRSLPDCIKDLDQLRILYPGTPKDDAFKYYSEEKVVVGDGDYVRAT  
INAAIIGDEDATGTLDSIATSSSTLSTMDFNTGSLEYDSLAAITGFPMSYMGDLAAVDYNSYGAPEAITF  
PSMIDIEAPATMDE

>Tt\_STAT2 MSG\_02036

MDGETLWSYIQDNPEVVAVYAESNPFPKAPALARGLFDALTEVLQHLETVAASVPHARFKLNRLTQIGR  
TLREEYAGNDARLLEALRVCMMAEAAVLEGAEGEGGSGAGVASSRAPQAMEDGGQSPREGEDVVS  
RAGPLLRQYNGLAHEARGSEDELRSVQELQEEFRVQYLQNEADRIAALAQGSGPNNPQARQLHALYQSLA  
QQSEQLIGMRRSLRSALAGEANMLRTLQATLGEMLGEWREKQFRKAVPEKILAAELRELRLQLLMRQAAAL  
FSLRERLEVLRLRQQLPPAASADDDGEVSVPEAETLAAAADAMIENLVLGSSVWVVEQPPSVVRRRVRTR  
VSIELLI GASHVVS LPMVSVQLLDAVTGEPASAQLLNATKRAEATNDGRCVAVFSSLCIADIRHASLTKD  
KLSAECMYRLAVSCEAGLAHGTYSLIAVSNPITLTVSRRQAALAAATMFWHEAFADSFEAITAPETVFW  
ALAGALEASFAASGRELGADVLAIFRSKVVSSVPGDSSDIVSFEQFAKADMGKGFSAWAWLFAAREVLES  
SPHMRALWADSLVAGFVPGSGVGGMLSAVPSGSFLLRFADSLGALSISYVWDDSRGRQVVHLQPWTLTE  
FETISLADRIRQTEQLTLLYPTFQHRDEAFGAYSPDEAVQAVDGYVTTGLKMTVEGGSESRQGGGSAF  
SFPLDLGPVSPLEASNPFTGMEPAEPAAGYSGMLLSPSLGAPAFGGGSPSSEGGGRLPELSFNMGLEP  
LRFDEAPSLGSPPLQGSASAEGLFGFGGSRQRS LGGDELDRDMLQ

>Mb\_STAT JGI38850 reannotated (5' truncated)

MTRLKQVTEQELVVDAQELLRSRQELKDRLAQCLPHVSDNVRDVAQTLQQLWEQTHNAKQDSSASMTTPEF  
TAARKRCETELVNTMLAYMDVLGRLSSALVVISQPPSVLKTQTKFTTTCAFLISDALALFLDPPTVTVS  
VINESQAIDVNERNQAGLSGLQRQDAVGESEGLQNNQKVLGSASADGVLQAAFKTSLSKKIRRSKDGESD  
VAMWYVGFWSRLHRDLRFVFFLTHPVTPLRIKVLNLHKLKSAPIVVVHGNQLPSAEATIMWDRALFP  
ARDASPGTFVLRFSASMLGGLSVTWITVDEEDGRQPWQLKDFAIRNLPERILGALS CIWDKSFDSNCRRC  
IASAHARHYRFSIASSVIGAVDLDLTHLYPGRPKEDSFGPLITPVTKVEKKKASGYVMADIAAVIRQMN  
TGLRFESRPQSSLDNMDGGGPAKRSVRRDTSRASHTSGRDGMDSRMSSAMS PATPMSAVGGAASSVPVGL  
SASGMGATSHLSQPRHQEQQLFMPQQQHQHQQQSLSQQPNMGYGGYAGAAMHSH PQSAGMQAQSTYVTL  
PSNLGNIASLNPALASGNFDWANMDDFFMGLQQNV PAGAPPTTSSFEAFTSSLI GRGGMNQGGPTSSAPA  
PGGGSTAV

**bZIP**

>Co1 CAOG\_07161

MANAPSVKLVAPSLNNTSMLSMNTPSFASFALNNMADGAQTPELAKWLNDSHLSNSEDILNVSVL PENTAN  
NTNTAAMSSLLKSAVVTPHPHQQTAAALMMHFTAKTSALS PPKTAAVDHSSDSEESVATSSNSSTTNQRR  
RRAQQDDNDELAQSKRVRVQVSGTAAGNDDDDNDNDNEADSADDTDSASSVFEDAQEGFVSLMAANGIK  
ASATAFNPAMMNHISAAQVSFCPAPITAGTVPFYSPPSSECDLGEPLSLNAVLSQANSALASSASTISGV  
IAGDSHSYIAYSSPQEQYDNEPMAPRKRRRPATTEERQSRRRERNRVAAVVCRQRKQRNEADLKDRVGM  
TRDNAQLLSSATQLRQTIIVLKNALLRHRTCTDPEMELAISSLDVATPASNVPLIAM

>Co3\_CREB CAOG\_04938

MSAHVNLENRVSLGELDRTLASDSLERRASDELMLKRQSFSLVDDLHKQEKQSELNGEHTASRGVAE  
PQAGHHFPVPAHQKLLDQQQPQSLQQPWQPALDYTPVTVQYAPAVFRAQPPAPIPIHGQPPQFIMQV  
LPSTPLTTAPPASATRGSTRSQQQQQQQQASAAAAATSQWHAQDDDHNDTSSDAESQHGFSSTRPADK  
KQRRLOKNREAAKECRRKKKEYISTLEDRVKVLQQNSALTEEVKRLQAALAQR

>Co4\_PAR CAOG\_08044

MLSFATAANPSSHVAGATQAAHAAAASVAAHPSMHGLAPVVAVPVLDLDAQDHSDFQLLLATPDIMGASVHS  
HLADAANPLPACFVDLTAEPVLKKGKRPMA SPLASSFDVAVAAHTADQHQQQQQMMADLQYLEHAFDSLDA  
MLQHEVIPPVVAALPASPSSSSSFASSPRLSARRSFAEIEESSTNMSSTSMSSQTFDLSLYEKQAALVKG  
PAPGSVAAVAAAAAIAAGASPTTPARKPRVAVAPATQRTEKYLERRRKNNEAAKRCRDAKLLKEDMT  
GLMADALSEENQQLRARVAFLEDEIEELKRMVLSRAVSTPSTA

>Co5\_Oasis CAOG\_01232

MAENSSPLPSAPDAFAPTVNWDALLQPQQHQPSFLPPLSFLTGGAPFGSSVAATAPCALPNPAMNGAHNT  
LVNIPSIMDFVGDTFDVLLEQQGTFRDDSFDVAVIEQPFSPPLPLEDPEDILRQQGFAPHAYGFADEDDNDS  
DADSAGSDSDSDSKPKRGNKRSSAAARRLAPGAAQAAGVLLASAPRKSSGPRTLQDFMDELTEEERRGM  
AAEKMDIKYGHPLTKAEERTLKKLRKVRNKISAQESRKRKKEYMSGLEARVNVYTSANVSLRGRVKNLE  
ERNRSLAVQVRKLRNLLGVSASAASTTVSTITGGGLGANAGLFAGEDALLPTNVADVFKAAAESGVAPVKD  
EFSSMSTAAAAAARRAPVGFGRVSNVSKGVCLMMVLLSFSMFGSLPLNTRGGAGLTGNATLDAAAPLLSG  
SSSDMYRISRTLKSFESSNMVATVLANGNQEAL TAMQHVHLREPLSVVPPAATASTNDSQLTSTSNLSP  
VSNEVTVALEVLRAQAPAKLAALLQTSDAKALAGLLSQAAGASRLSAAAPASLGAAATHERAALARS PV  
DALSG

>Co8\_At6 CAOG\_04023

MEQLGHHDNDAAAAAAMHHECGGGGDDDDPLKVEIDVGVFDSLTSDEDEHHHPSSHSNHSTSSSGNSG  
VSQPWSVLDAASTLSPASINDTDFLDLLDSTTTTAPTTTTAAAAASMRHVVDVDDVGVGRQQADVALLM  
GLDLHHHADDDAHNHQLMAWLDDSHHSATSSITGAPDLLLLMTAHHHHHTHTQPHHQYAAADHHSLLGLD  
LLQDALLHPSPTLVAEHYQPQQHQPPQQVVKLN PASSGQYKRLASLPPLRPLQGGPVAPAPATTTPTMA  
TTTTTTNLGSAYIHQQQVVGVAASPPSSSSGHSSAGEEAQFATANTAPAAMYQQA IHPMDKKLQRLI  
KNREASQSRKRKKDQFDTLERDLNTIKTHNAALRSQVVALEQENAVLKADNERLRSFIDTTPELRVSYE  
QQYGPLLGGSGSGMRGHGSQVGKMAASLSRSRGAASVTVCAVLFVVGFAFLSPTSFPGAMLGGRQRYD  
MMVVN SERGVAHVGGRLAVDDQGWGLSVRESSAVGLELPAEATRLSEWQGGPPARVGGQNTGLPLIT  
NEQRALGGRGEPALITNEQRAIGGPALLTNQQPAIAGPALLANQQPAIAGPALLSNQQPAIASASSSSSS  
SSSSSVYAIEDNLSINMQHLERIERASQQQLQVLEQQRQEAI AVAFQAQLGLTSSDVAMLAPPTLDHVG  
TFMEQLAIDRRVDTSYLVCAVDRNIWPAMVETAKSGSRPRLSFLIPSTSVLNADGTVQDDVTVEDDIESA  
QDSLPSADAPQPASTTNATNAGAIKSLVQIDCEVLQTKLIPVRANATTAPAEPRRRAVAGRRPYA

>Co9\_C/EBP CAOG\_02294

MDLPCRQQKQQQQQQCACLLSVRGGRSILNAWHSDFSIGSAAPFGTFGSTPFLSLATAASQRAASILPP  
SFDSVSSPLSTLSSPSTLDACDDIPAPTVAAYLHQLLGGSSSKERDVRLLHHPDMLSYLAGHSAAPF  
RRASTAATKRPSSEALASPPAQRPRLDGSHSAAAAAPPSSAVDWFHASLRDILNDENLVHLHDAPSL  
SMQQLDPSLASPLPVQTQPVAVRLDVPSSPVLASIPLVPSATDLVTLADDHLLLADHPRSLSVEGLLL  
KSSPLVSSH DHNLA VAPLLL LAGDSL PAGSWSLPVSNHSDTSPSRALQSLLDSSVEHALNSSSVANAHF  
PDFAGLFEFFDLSFPQPPAAFFSEQSFSPASPLKESTPQPSPSAAAATPAAPAAPVVEQSPI SKPRAASS  
RSRATTQRAAASSNKPVKASAVAAVAEKAAPASASSSDGAEQELDAGDLPQRKLSRRERNIAVRR  
RDKNREKSLAAKSQCETVAQENANLRVRIHSLEQEVSYLKSMLLSQVIPGMPLPSASR

>Co10\_C/EBP CAOG\_03823

MTIEPSFASQILNFPCTAPISAIADDTSAMMLMLEPSFVPQFRGDLNDFPSSDMLEFDAALLAFEAAAAS  
EGLARVCKQSPCASDASSVSDSAVSDAADRASFASEPALSQTFDFSLHSNADVKKRSGRAPHHTNTKN  
NMSFIDESVSPRKRRAEEALRDRSSGASQSLSGSPRVS PVASPAVHLSTDRQLEAGETLADYLDKRKK  
NDAVKKCRARKRMAVVATEEEECQRLSGENASLRDRVGSLEAEVAYLKNLLISATAVAANLA

>Co13\_At2 CAOG\_06753

MTQRLHERRNAAAATDAATASSHNNHHGHPHNHAAHHHQSHSAAAHGRHDMQADHPSPAVFTPPAFS  
DHHAANHADRGWNGFGPHLRSHGLTPGASGHHETSNNLSIPGFAGPLSTNSELELIQQISPFDAFAQV  
LTDDGDRASRRRRSKENGAAASPGVIHITPASPRPRSGRVRMEAEPEQAADASSHETDDEPSAGPRRR  
HSERNRRRQSPFTIISTAPEQQLSARIITEADMEHSNAAHPRRSARIAASPGLLLSTFQITEVITPSVLS  
RVALNTPFLNEVHSGMLDLNMPHEPITASIVHTTTPAQRVIELAKPVLLPGRQRRLNGTRPTLSSPGV  
DASSSSPSLSASDATSSNLVVFVTSATAREALPGTTSAAAAASAAAASASASHRNKPTHPTAVVGGP  
PITPGTFDRFISPLFQSGEAAASVANTTSAAPSSSVKKSAAKAVKPSKRSAAEADLDVNDSDADSTSEFT  
ARPGATEEERRQLALARNRQAASRCRAKRRWLSLEQREQS IQMHNSALVLEVEELRMEIERLRQVLLK  
HTDCAVTRALQASGGDTGMEVKPTIASASNRVAQIEQNAEIPTKPTVVKFALRTPAKHSQSTYKYAG

>Mb1\_Oasis JGI32766

MAAPLSDVLSLPLDLDVDMGAELEAVNDELVVFTPGTLSTTFAALEQEGSV DGAHDALNMGDYDLEPG  
TMAGASNRASTSQQDDTLLAGSMNLDGIAGIDDLVLEAELPGDSQTTQFHLDAATMNAHAALYSESHTS

PTLEHEQASSVFSDEDSGHASDHSSGSEALSSAAGHFAVHLGEDEV DATVEAEVCVPRAGKRELAKRPF  
KRSKPNFYEDMTAEERRLVEREGFKLPKDRALTKAEEKELKKVRRKVKNKISAQDSRKRKEYLSQLEDK  
VKSAMTNNRSLKTRVSSLERQNSNLMEQINELHARLARATGGGSATAGTALMLVGLCFSLFFPADLVGSG  
GLELGGPTPFQFPAPTDSVKGFQARTLAFGPGPAGLMDLDGDGDADYVRHPGSHASVPPASSAQAAD  
ERLARTVIDELGQAIAMNTAPSTEASMEHLHTAFHNINRSaelDENTDEAPDLPTFTASEAVPMIAVGQ  
ASAQA

>Mb2\_At f2 JGI37668

MALEEILDGGDLFSGLDLPDIDSIINNAASSSSEVPDDALWSNLKNNGKTIDAASSSSSSKKGQVMKRKS  
RASSVDPPIDERRLKHLEARNRAAATRCRERKKQWLQQLQQAATLTTSNRQMHEELKRLRDEVNLKGNL  
VQQQGFNALERAGIQLSKYSDFNFDFEAYTAQALAEQERQAEEQAANSKRAKSKKN

>Mb3\_At f6 JGI22289

MAPTAFDEFGSLEPQDQFLGADLNLGLNPSIFDPLMLEATVPFDDGAEGSLSLDDVTGTGVCEESPFPSL  
SHDPAFLDAHATKPPRLDSLVSALSPPFGEDCAPIGQDDHDSIKLFDTTHELPTFADIVQSTSEGTMS  
SAAASPLSTTNATSPLHHATAPTHHAGSTQSQVQVPIGLAPPTPPTAYPLSTTSARTTNTPLAARAE  
MKRKRARRAKAIDPTALS PVELLEIKEKKERRMLKNRESASLSRKRKKEYLETLEHQLHDAQQLGRAHQ  
IQQLQNDNHVLRQLANYHGFVNSQPSLQQQFAAFASQRPARTAAATVMLAALLCVAFVGAGPSNLLLRG  
VEGPTSPMAVTGGAWHARTLQAAQKVP LLAHVHNAPSDTVYPLGLHHDHLLTSSLRDGP PRAMPSNMLNPL  
LKMHEHALEERMMLDGVRIPTPEPGHQSLVDPEEEELDGVPTLRIGHNQRDALETTVHRKDDTSYIFCTE  
VKVISAQAASSRSRLSLIVPTTTLLDDLDNEGEAAHLMQIDCDVVGTKLIATENATVVG

>Mb4\_Oasis JGI30420

MDSL FANLHGANGDALSASDLMSAASDVWISDSASDLHFASDVFLLEDADASNTLESVFGEPIACPATALS  
HQEQQHNAQLLVLPEQQQPQQPQQPQQQQQQPPQHASNALLTATPLPITATAPGLLPASTASTTTS  
GKRKCHATSHGVAPPNPTRPYTATPTLPQHNPSSARPLSQAPAQAYLAFPGQSLQLSHQQRQSQRHPQ  
EHQPQMAQQOQQHQRQQHQQQQSHQQQLQQQSQPQSQAQQQLTEL RPQAGSAYA AHPNTT PSL  
PPPHSGNNHASSSGAQDLAPPNTLCPPLSSSAFASAKRQGLTPEGALAQFLTSITDEERALI ISEGVDV  
PLSGLITQAQSRELKMRMRKVKNKLSAKDSRRRRKEYVTQLEEENAQLRARLVTLHDQSMARQSMPTTS  
SSSSTTTTTTTTTTTTTSSASPSRAHSQPSSGRRPASRQHHTYAMVMIMLALSSTTRLGSQPLTGAPSP  
NLSLNLAEKMGHGHNAVLASSPLSGSDCESVDDLYGDAGSELGLAENPLFSDLASNQDADLIEPLSTLLK  
QGTAGLNMHVANLPVALQQQLAHVVLSTAGPQFDSGAIEQAI VLAPKSNLNLWMQDTAPKIEPVSQ

>Mb6\_At f4/5 JGI31254

MTQPDPAYSVSTTAADFDAIAASNLSIAPT DAGLAQAYSTSSATGVNQNSLFLDSPD DALFNADNL  
LQAATFPSTGYSLPGMSLPVPDADSF AEPFFAKFLTESDINA AFPAINPTNRPASSAAIGASTDLPLLPN  
ASTASFP ISTSRAVLPELHQSSALS AASGAPLLGGAADLASPTLFAHLSDDGVGLRADALSQLLDSAPA  
RPITRPPSHGHTTVSVPSGPVIAPTRPTAPAQLSPPGQASHTPDTGRARTAPPAGRSTAARPATSNVVS  
AATPHSSDTHEDDDHAGSTSNPNKSAADRYRKKKREEFERLQHDTEAMKAENLEKTRLSKLRNEAEFL  
ANMLQSAIQYSPNRLQGLLHMPARYVTQAMLEPGLLELSTFLSKREVIAALLTQIEAPDVLTSD

>Mb7\_At f4/5 JGI32251

MALQEFDFSDWYAAAPQGS HDLSEMDFGSSLSLSDQSKANLTAELSGETTSKRAKTTDKKQLNKQAADRY  
RRKKRQQFEELQSQSSELADENKALS VKCERLENEVAYLKDLLMTTIKTSQTAPATAQPSLDGLDATVDP  
AVLEAVPPALHTLVKTLVNQRRSVMEARFAALEEKIAHLAAKCC

*bHLH*

>Co1\_MLX/TF4 CAOG\_06632

MPLSSSSSSSSSSSTIIPSSASSCKPRVLLPQPTITVAAPLQQLRLQAIPLHAIQAAPSAGVCLVVPSS  
NTQPHPEPPVSYLTPISERSSLALAVAPLPKPPTRGLDIPSHSAASPAGFNEGVRASQSPGAGVRDNRV  
KLAHVASEKRRRDSIQVGFDELRTVVPDCSSCYSKASVLQRTLSYIRTFQRANGRVSGAVPTAPAATEDL  
HKQQPPLHHHGAPNQVADALLQQQNAMI AVLRA SPFLSEAQQNELVAQFTAKSSVDLWANMPNNA PAFAS  
GALRPLTPACSLSTASMSDDDEPATPSSLS

>Co17\_MLX/TF4 CAOG\_00266

MLHAIDLKPHGLPPLQAMPQPMQAMTANGAANGAARKPRATAQKPLLAMAPMPMPMQQQQPQQMMHF  
QPQQLLLDDAMLGDGMDVNDMMSFMNTRAAVDNDDHDDGDDFDEDDALAAAAPHGAASFDASLMPQ  
PLMPAASTAPFQTGTGLLPSGPGVDDLLASLMGTSSVMQPQTLLNPNAAPISLEQNANLINLIMSLGAAA  
PPSAQAIDASAGANLAKPSLSAAA EIRRATRVEREKRRQKNINSGFDVIKELVPGCSDLKISRATVLRQC  
ANYLTHAQQALGQYKVVNEHLKSENSRLVAENARLSALIEGMMKNSLSQFGITSQSFAAAAAAAAAAAAA

AAAAANTTSIAPGTSTLRPANPSSLSPASVDGSIVSRSSNRSSNSVSSASSSSPSNDAAVHSPHGSSPSPS  
SSTAFSGVSPKLRTLSPLLPHTAPSVDLLIPPADLTEPGSNVYVKDSTRILLVLCVFFLI FPAVGFFSR  
EDPHLIAGGNVPSFSSGRALSSVDAGLDGGAAPTTTDDGFLSGIFSFVPLSVVYHILLCFRCLAAMIVA  
RLILSSLEPIAYRSETMVSQAAVLRKAGETAYKEGRFEAAHEFFVQALGTLGNRYSFSSNWRALNIE  
TGHHLQSKWKVGGQIVDRHLRWATRNTSSANHELARIYHGIHMLECFQHGREKAAIYSALKALNHAEAYE  
HIYGATTPVLSQIYCSMAFIYDRIFPQFNYITRHYRNLVNRRIIDLGEDHARGVQEILQLQRSEGHWCQI  
NPMPGLFIVFILLLACTLCQFTAFFFFSTHTYTDLSALMHNAMVPTLILFPVAVLTMP

>Co18\_MLX/TF4 CAOG\_07309

MGLAGSDEVLRERVAMMDRSSSTNLNSAASSTFSSMDSMAVSDDDDDPDENDDRGGTTMMSSSSSSSS  
NGNGTKPGNGTGNGAAAARIQQAAAEQRRRNSINSGFDELQRLVPVLQPKFQGHFRFSKATVLAKTAAHVS  
TIIRQSTAYSEEVNLRLRQEAMALAIVNARYQMAIHAQQSASQAQTDAMQLCEADTSFQRYEPALPHGNVT  
SSIPAPIGWLPGQPQLSAPAPQVLVSTALGSVSPSSVQQISVTSTPLPTPDEAQAHLVKFQLFRHIIENL  
FATFSPAVSLNSYDAMSASILAWVEEHCHPDRLRDVSLAAAFCTVAGDYFVGGPPST

>Co28\_MLX/TF4 CAOG\_07309

MNETNEIIVKQSLAHAQVFPVPPPPPSHPTVQLDESRLARVFSHLSLEYDATVDAVVPRWKKFSRSNSYRG  
QTLAASSTASSGAGTADDGRQNDLPSSSALYGGVTGESEPRYTSNEAAQAKTAVYLEHIEKKRLDNAIW  
RAWHLWRVHGITTPYVNFVNDRAALAAQAAAKHKNVQVLRGQLARIAREYHSWRAFYSKSDVYRQIQRRS  
EEPTAPSTSLMPEVPAEPPAPIDMSTEPFSMSTMDVEPSSGFALLESLASADEENLLKDLVENDIFADE  
MLGEALNGLSDTLFSSLGPFAMDAARANAPGNLDLSNYSTANKHSQVSRPLRGLQTIELERIALQPTL  
SSGSPVPPVTASYQSSAPNSRRNSTTDVALSKLAHVAHEQKRRDTRLRSGFDELTSLIQLPVAGHTSFSL  
KPNQKLCATVLSKTVEFIESVHRQNAALAEANRLRQEIYALKMSISQQQAALLQSGANQAMLPTRPD  
PTNIMYREYVQATSTQNLKFWIFSSIADKLFATYSPIVRADTPDAVSDTMAMWLSNHCQIEQLREATLSA  
VRAIGSALFPGTSSSVSTALPIMPKPR

>Co19\_MITF CAOG\_03375

MAGRGRGGRKSSSSTSMASLDGSTQQQQGFRFAGDPASAAAAVAAAVELQLGAGLSNTAAGNARGPFMVP  
PAASGPASSMLGMNMHSLQLGGGGGGLGAGAAAGLQNGELDAAALHGLDEFGAHAHQQLSASLPMSMML  
DHSVAVGADGLGSVDDLLLNFPISIGLQLTPNSAGRRTAPMRMSMLGVAPGSAGPVVQATVLRDEQKRRPS  
SSVPSTPLRSQMLQLQQQQAMLGSRSRSTLLAQPLPSAVKQEPFSEHEPFGNEHDASGGLDSDMDIAM  
EDQQESGQSSLDSSRTSSISAGQPPNLASAAALGVFAPSSFNGVQVQAGAFPEAVTVPRQVLNVRSSLAFP  
TAYHLHEKQRLQLQEFISTTMNQPGDAGMSLPPGLVGAFTAVSSTAASSVIGEEVSYDFDDGQDEAMS  
SLESSMISQSGVPSGSGMFMFNGAGMAGSAPSDYDPDDIQTLIKSRKKKDNHNAIERRRRYNINDRIVELG  
SLLPNAEIDPKASKGSILKRSVDYIKYLQDINRSLSEKLAQTGTVVVELPEFTSTGE

>Co27\_USF CAOG\_02389

MNPAQTSYFNPADATALLDMKPSRVPLAEHRKQMAELERLKI VMANSAHLMGAVSSAAAAASAPASSHHQ  
GFMEVFANAI PAAAPLSARS AVSEEDSLDTFSNEDGTPANLMDLLIDFDVNAFSSMNVDLGATTTLPA  
AVPAAALPSAALPSAALPSAMPSSLPAAATVQATATANANATAAAVAAAFVAAASANAAPGHSLPGPFPGF  
NPLAAAPMGAWAPGQFNPSVAAAAAVLGLAPMIDQSNMMRKQRRRDSHNAVERRRRDNDRI IELSALV  
PDNGGEKANKGETLRKAVDYIRYLHQCCARSFEQLKEATKMQMAMNAEIEALRKITGAAPSQQ

>Co8\_SREBP CAOG\_05901

MLSIQQQQQQQQQQQRIVAAAATAAAVAALQQQHHALSPSSSSSTSSASSSSAVPSSSSMAGDAVLASATA  
AAAAAAAVASGSAQHQQNQATSSSNAAPATATATAANLNLNLMNMDEDDPLFTDFVLSNYGFGDLD  
DLSALTAHQQQQQQQQPQLGLFNAAANANSIHLNSQFVGLGGLGALAGLPTSANPMLNAAAGLDVATVL  
KQQQHFQQLQQLQQLQQQLQHMHHQVSRASSVSLDAMSASVDGSSSTSGMLTSPGSPQSLHSHLSPAPSSA  
SVHDDHHIAAIYNNAAAAAAGPSASASASAAVAAAAAFAAS PAGESAEQAFVNAATAAARASANGLDPNA  
AAAAAYTATMAAHSNNQQQQQQQQQRAVASAQQAKSPNPSEGVSSPPSMTAAAAFGGLAHSIPAMTAA  
AATSPKAASPLFSFGVLPPTATGASAAATVTGSAAAAAAASSSSKMAISRLPAAAAQTTKAVPKGAASGA  
TTTPLMPKSKTEKSAHNVIERRYRNSINDRIELLRDVPVPCREAAAMVAAGTNTVKIKLNKATILRKAIE  
YIVFLQGSLEERSRHEKATMQHALEMHGVDATQLLQTI EAELGAIKTEMAFSAADFDDNEELDEEFRDLPS  
LSNLLESEDSNEDVSPSDSPTITAMTEAVKPAKRGRKPKAAAVAVGDGSTPDGRRKKAALVIAPASSGGL  
LGGSTVGAMRDGSRMMLFVLMVTLFVSPIDTLVDTNAPAEHLAVAARTLSSVEVAQLSNTIWMQGLLMT  
AAWWFLRAVVVVVCLARVFFGEPVTSKSLYHRAQELQKAAALANLANGDRAYAETNLIAALEILGRPOP  
TSTPELYVAVAWQIIRQVLHRLWIGQWIDEFVARSNSNARVSFKAAAGCFHMLQMVQFMSSTSNSGHSTG  
VSSSTTASDSDEQSSGNVSAKAPVSRSSHLRLNVNLAVNLAEASRGSVSPSFLIEVYSTAALQLKYAF  
PRRFHFVTRQLLMLAKSVRADAGDLDPISLWLFHTDGYAFISRGLWRASFARQAALSRTLSPGLLGSY  
RTALLDRAFAVLVEQGNALRALDLMQEARQYALDAADVSAEWWAYIGLSSAHLRLGHTTEAIRAFQTAEH

LLSSGTMNEPVTQVQQALDQALRGSIALLMDDGVTAIRCTEMASALLRDDPALVVIRHRAAAAASFQQQQ  
QQDSDGSSAQGISDTS DSGSEDDTVSDLGQRRRNSGLALSTGSAPLQQLAASSSILPHSLTGQILACVHLM  
DNRFALWQWLRASHLHPARVQELPLTTTAQRLSAGVNGDVLRLCLSHAYPAAHSLAFLYQAMARTLAGG  
SSQRTRAMFVRALAEARSATSPFAEACVLLKMGQLLVDTESQTNDAAGGAADRSVPTVDERRHWSA  
ASHIFESLHATQELDLCRSLLKALLDSK

>Mb2\_SREBP 32649

MWRGCWWLGVGLSLIFSLSLSRARPDINSNDSSSEAKLVAVLLCYHPGYLVSRRAVTLLEISSSLPHLH  
ATPEDDMHLLHDPSEPLMHFNANDVATTLASTSMPPTGMPVPMMGASLIPEHHISAADVHRVFAGKRTN  
AHSYAAHDDVHPAAKRAAPVAGVDNTHPIITHGFDPDIPVVSQTLASAPPAPQPMVNPNSPELKPAVDDL  
SSSSVPENSDAASSLLPPVPPPPPETFKKTVIKRQGPKLTAMDKKMAHNAVERRYRNSINDRITHLRRL  
LPPTWTTGPKVRTNKAAIILQKVTAYLHFLIENNQELHREVTSLREVLAAHGLADAGNAVPTVSTNPTANV  
LEDLLAFDSAYDEAYPPTEPSTPSTVPAPAAAAAMAMLNTRRVQTGNMSPPSDSDVSGHATS PNAPSSPGS  
VRSISPGAPGAPATATRMFMVACVAGFTFFSHSLSAGFGGAVEGPAMAMGPGRVLSVQASGAGVNTGGD  
ESLGLWSTALFWCMQVVSLLLAVVIVIRDPVTESESAKIKAAHEHERKTAVARMLQHHTASWHADKAL  
ECLNQFQLGASRMQLGLANHVLRQALHTSRGLWAERYFASSHGPAAAEFVLAVLARTYHHRHQVMLDTRK  
DAVVTAASLECALAAVNAAEAAGSQLSPVELGRFYAALAVELVLQGGSSFLAGMYLKD KAVAACAAAT  
ASLAREACRTAVGPEQADEEDAESDHDVSLDNDGEGDPMTPMANMEECEFAWMFEPQGRTYLLDGTWLT  
VSALGARKPGTLLSLSVAFRHLLQQGMQDLVAGRDLALATSRLLLELGHAVANHAHDHWWALATMVP  
HWRQGLREARSKLVQAERLCPKRDLLQESLYAVLRAQQALLDGDHALCWLALQRASCCYARLPPAHPVF  
APALDEMARFLVLRQVMGVRVALYRLRSYLRRLPEAEVDALRERDGSVVTFDVMLTALQNDVLDATAFAQ  
SLPYSQPQALLLRGICRCLAGARTEPTEQLFQQSWTLAEQLEQPYDVALAKLHMASCLSSSLPKALLRTO  
LEEAMHLFERLDAVDELNSCRKLTKLDSR

>Co5\_MAX-1 CAOG\_05983

MDSSEDADTSSGEDVFPQDTSNMTPAAAAAIAALASASAKRSSGKIEKASKKKKPPRADKRHSHNLLER  
KRRDHIKERFTSLKDVVPTLDEEQNPSRSAILHEATVYINKMREATFSEEHQVRHLQTANQSLAKEVQQL  
EAEINKR

>Co26\_MAX-2 CAOG\_01784

MEENTISQGEYDSDDMEDVQPDASGRHVKRAHNNALERKRRDHIKEKFNELRDTVPSIAGDKASRSLIL  
NRATEFIVTMKQRNTAHEAEIDAIRKQNETLRKQILDLENGHS

>Co6\_MYC-1 CAOG\_06158

MSTDALLASHSEIERALAQDAALLDYLSDDLASHHAVSAPGSPTPVAYDWTSFDSAPASPAHPTSHVEAS  
PQAKKAPVAVASMLLERRGLSLDGATNLRMFVGHQNAQLQASASVSASCNPSPTPMMDDLFSGEMVAALS  
AYNTPSATPRHSPLHFRESADGNAFDVVPRLSASHTSSASSSDSDMMISATMASHSSIDFP TLFISDTPS  
VGGAAHANAVLRPSALTLSPDSRPASPLPADHAVDTALSALLHSRLNNYDLVVKMDAEDDDDELVGVFDD  
EQAGFALPILNPAVSAATAAALRAAAAASAPCSPFYDSGDAEDDEEADDEIDVETVDEYVPKRPLRKS  
ANSFVATQRRLQRGSASLPVSPASSPARRSIKRKADDDMYMPTGSRVSVRLQAAASLPSSRSASPLPFPS  
SASYASTSAWAAKRCTDVSVLLAATAAVTAAASGDPLPSELMNALGVNPDGKPI TAVAVAAAAITA  
GGPVSEFDMKRNINHVLERKRRNDLKDSFTELREVIPEMAEDERTPKAKLLKEQHAEERLRQLRSRKS  
A

>Co21\_MYC-2 CAOG\_03433

MTAIAANRDDIPSGGALDDLDLHDLHRADHLPDDFLDAAFEFSAYSSSFVSVAAPSATASPYCSPAPPP  
QPKRNLAISRTHQSRPLTHSASAAAAATASANAQRPPPIGDPATPKHAAITSSSTTSEGQTADHHNNSP  
HGVAMLAALDDALSQDAHASELASAALAAADAGDHVLLTAAQLDAFSSHHPEDHTLPVDDTALRSISAGMD  
ALANLPDDPAAAAIQAWESHADLDFPQLLDSDHDDALWAGLLLNDDMSDHMHLSVAHLDGANAEAAAAA  
AMDLSDDLAFMQHHDSEAHLSGALAALANS DPNQQHHHHQAYSSPAQPSGLVLT LTKKKQHSKSTPSTP  
VTTPTRKSTRLTRITAPTASPSKAQRKRDAAAAAALARANTLSGSGVDDDMDEDEVELEGFEDTETRLTK  
VEPALAQQAALRAQQQSFSGSYAAGTPLASPSMAHRGGAATAAHLGVPLAPQFGSSFGTPQRPSRPAHDE  
DDEDEEIDVVGDESDDDTAAQLPQRRPADSAANGRPVRSNLVIPQPAFASPAAPIFAQAASSYAAAAST  
GLTPRIGTMNLLNFPTRTQSAPSSPLQRPASAVATAARKRKNELVTPSQLDMVLLSPTKRARSVENVAAA  
AAAAAAAATAAAAAIAAGGMSTPGTPNPRSGFMTSATMSPMSTAPSSLNPSPTSPVPFNEDDGAMEGD  
ATDSVAKRRFHNVLERRRRDDLKNSFIMLQKKIPELVDTSAAKVHILRKAEEYIRSLCDREVELEAKA  
RALREHDELVARLQALRGSR

>Co10\_MAD/MXD-1 CAOG\_03883

MAALLQAAELLLQREEAQHFPMQSGGMPPPPAPSSNQRFAPGAPMPMASPQQPHHPMMMHAPHGYAPMD  
PGYHAGYQHPTHANRTARSQSNPPQPLAYSSLSGFHAAPPTRTMPSPQAPMPHGGAFQHGMYPVAPPAN



AHHYMPFGMTGSSPSGKSLGIPTGAAARRRRNSSMRESFSYDVYEDDEEVDEEEDEDEDDTDEDGYNDGD  
DDFQVSSSARRTPPAPARSGRSRTMSTSFSSGRRNSESGFQPSYPGPFAAGHSNPATMSPASNSSGSS  
GATSSGGLKNNANGSTGSLGPADASPGGSSGGRSGKRSVKNREQHNMLEKNRRAHLKTCFEELQEAI PG  
LDMAKPSTVAAILQHAKQFIETLHYRQAQQQAEIDRLQQLNVWCCSKLDALGHPVPAAYLQQPMQKAPQH  
HMHPAGEENGHYYESHHHHHHSHHHEHGHQMDMESSSTSSSTPSDKSTDVDVERLDGNSPEPPAHGTTRSG  
RTSRGRREQ

>Co13\_MAD/MXD-2 CAOG\_07879

MSAAVLLLEAAKILAASKQDGSQSGSSDEEPNNHSSGNNNGNSQPTTSAATAAAVAGANTGMTAIAP  
VTGMAGMAPLNGSQQQEQAYNLPQQPPQLRPPHPAMPGSNTMQTTAMMMPPPPPLLPQAQFARSAPVPLF  
DPYLHRKQQQLQQPQLPYDAAHALLPPPLQHDQYAGLGGMTGTRVRASASFSGFGSTANYNPNGPSAPDL  
NNSGGARGIMVSGAGGAFPRMSPNELGGKRSRAASMSAGDSPASGGGFSPASSIGGGSSSTSGTQWVKNR  
ETHNLEKNRRAHLKDCFTALKDAIPEIANNPKTSTVAAILQHAQNFIVKLFQFMTDSVVANINAFQQHNQQ  
AMALLQQHMSAEYEYQVVRHVASMAPDGPASTPAAGRGASNGRIAAKRSATATFSGSDSDEDKPEHVARK  
ARQSHAGRVGAAKPSNNGRGVAKDPTRAVVGDLMINPHQFALTTSTMTSKHQMDRSLANRRRRTQSF  
DITLSRQRERSVQLRAPSPAPSENSEAPSSPSSPLSTSFNVDIEGSSSESDSPQSTSEAGDAEQVRKKPR  
RLEA

>Co3\_ARNT-like-1 CAOG\_06106

MLGSQRKRKASSSTSHPGSQGAAADEQARSRLRLGDSSDEEDTSDQEAMQVTEPAAVPGASNGGRGRGRG  
RGRIVKKTQSYRDSHNAIEKRRRDRINASLRALARLVPECALLESASSDKGKLDKADILQYTVQHLEKQQ  
QSDPSSSLLLPSAKQPHAADTPASSPGLTSSSTQGGQPLTLNTMTYRDWCQLLIDRDRDLVHVFLISGE  
ILHVSHACLATLGYSTPAEVLQNLALQWIHPDDLDSVMAHVKTAMLELLSVQESPDVAVDLARQQDGGVAG  
IIFPASRSFAVDLWYRLRSKSGSYQQLQVRARLVLPFGSGAPMTGSAEQTTGHPSTGISPRSSATPSSGA  
RSSPAETSSSTSYMHGPLTRAEP TLVLVALGRPMGVQQHKPDPQPGTGQPI TAFTSRLSLFGIFEYVSSL  
CKPLVGFGEAELIGQSIYLFCHPDDVLAFSQMLGRVLGNPNATDVVVVRFVFTKEGPYVWMTTKMHVKL  
NSVTQAEPCIVCLNTPLLDANAATESGAMAAPASSRSKPLEQHIPTPSDHHLPGSASSMALSFGFDPHMT  
QGLLQPTLSNNNNNQPSQSTSSSLLLQAQALQASQLGNPTAIQTLLQQQQQQQQQPHHPHHLQHQQKVA  
PSQFFNTPPNQIADTSKQPAVHATVSQSSLMPQPFPTTGPPEHMLSGLSSFGLDVNFPEPNSALLDEAL  
NLSVRNKEQLMQLDKIGVAGLSGGLANGLQPTTSASGAPGFSNPVDEIHRRQSLAKMTNRGPQRFI PSI  
ADIDKFLVTPPPYGSYAANPGTVLPWVQSVQQQQQQQQPLSPFPQQQQHQYQPSQPPQSLPQQLPQHLPO  
QLPQPGQQLPDQFASFQASTAANPGPSAMRTPALRIQHLLGDDTGMAGMEPPMSQWA

>Co9\_ARNT-like-2 CAOG\_06970

MLQHGHSGAGASHLPLGLGDDLAAMVGYTTDNDMLEAIEEHLAATTAPAAPVPGSLQQLMHGQPTAAAA  
AAAAGWTADGFGPAARVQQQQQQVQHYHDYHYPQQSQPQQSQQQQQQQQQQEVVSAPTATTATRV  
TLHQQQQQDALWSTAPLSLAAVQHQQHYQHQQHQLQQQRQRQQHGGHQSQTLSLDDALSTVAAAAG  
LSPPASALASVSASASAAFPASAAAGVMAARVASSEASVEASSADDSGLLAQPTTLLLDQPLQQHQQ  
QQQQHQFPKRAVKGTTVSHRQIEKRRRDRVNEILANLQEMVPECRKSEGRLDKTSVLAMTLRYLKLQLVG  
GSSSSSGGGPSSLSMDDPAADDSTDSLGNIDRSSEPGVSSPVSALALDTATPREDQLLTTVNEIARMQ  
SSPGTRADDAEWHQLLLDHVEDLIVLNRDGRILQISRSCFPILGYRPAQLVGKFLFDLCPSPDSARVRA  
GLRHRELDPIKAVDYAATAELGATVINSRLVPIKGDVWVFEFKLREMSRNGHALDCLVAVGRQCSALRVL  
HFGSPLENSDEF SARHDLFGRFLYVSPNITRLLGYQPVDMGASPYRFHHQLDVPRTLNAHRGLFDQPAT  
QVAFRFITKKGNSFCWMSRCEFVRNPVTRDVEYILSTSRVLSSEIYLLLAGKPTNTSDPITALPAPLT  
SQEDADEVCKSVYIDDQRQVPLVSNADDEVARLYLDEPTKNLSEKSPLSVGVYSSSAPHVFPDLSGSNSGGS  
APEQRSSEYQTRAQPF TDAGTTNFGNPAVGTVVSDLMSSVLTTLQLENQRLHEELAKQASSRSADAADQPS  
TMAVVSDL

>Co15\_GroupC-like-1 CAOG\_08129

MCAATGPSALLASDSPVTLFLNDGLLSVATAIPFVI PAGTS IQSAASMCHQALFGTPSSAAKLFTDLGVE  
LMPVMSRTPLVIPANQALVVTGGEPFFPLTMHSQIYQDATGASVAAGHTLAGDSQATQDRLSGIYNESR  
RVQEQQYRLLQSLFGQLEQAQTEQQKQLDPLELASASQDFLDTAAPLVTHDFANVLDSAVRALYRNDGE  
IGPDKLASHVSYAMHDLQLMGQPTSTLTFPSAAAAAADVAAAAAAAADVAAAAATTTSSATSSSSSTA  
AKPHTGAVATQQVSNSEAI FNNMALPRLNVVATREQLSVANWTSQPAPETMDMCTINRKLQVERYRDR  
LNLGVADSVYRVNPPVVRGALDEL SKAESPAASETESTGSAHSTSTAAAASMAAPPAADSAHHEEFMSM  
DMSSDEESGAFSMGSGAGAARGKVKERGM SHKQAEQRARDRLRTSMQELVLSLPAPENVKNASRATVLK  
KAAEF LAFTRRRNDTLKAENDRAKREIMELEAEQRRLQQQIQANLMTVEITDKNHRYVFDVHMWEIVTG  
YQRTEALGKLVDRVAGCPTCALMIERGLEIMHSIEKGI EWSGLMMSRRKDGRIFASLAHIVPMDETGQV  
IQNVCTRRHFHLLDFMQASSVCTFEKSLEAEVQSAIPLNVVSP EIVAADVSQAFLSAPIS

>Co31\_GroupC-like-2 CAOG\_06284

MAKVYVTLFRNDGLLEAAQARPFVFDWHIDEARSRCHERLYGTPNSKARLFTDLGVPLDDVAFIPAKQ  
SVVVSSGEPFVHMTIREIRIAAAQQQQQQQEQQLHQQLQQQHHHVVVSATPVANNLPVTTFSASPLTTPFAD  
EDAAALFVPSQGPLDVGALLPGEDNLIDTILNDMYAQNNTAENADFGYPMEDVNLRLANNLGSYQNEATAF  
AQLRFDHSQGHESQPVTEQAIPYMQARAQQQQQQQQQQQQPQKQPSQQSLMDGDDEVSTWTVEDAQLQNI  
FDNIQFPTADSPVSVFNQQTSPIQFTTIPFSPQDASYNSTPRQQDSGVSFSLGNGLPTKTSASQTTTTTR  
STEARSREKVRQSI AELVLSVPALASLQSPSKATIIRKATEYVNQTKNANNALIKENQQARAIIQLQQE  
KLRVQHSVQVSNIMTVEITDPDMRYIFVDHMWEIVLGYPKHEVIGRFLKEVVGCPCTPLMQKKAADIREN  
IEKGSVWTGYILGKRKDNRFACEATINPVTDATGKIVQYICTRRNFHLLSVKECQKVCEDVEKTPRLDI  
GMNLTGGIALTEESLAALTVSSATGLEYEADTMNLCPLVAE

>Mb7\_GroupC-like-1 26507

MTPRAAKRAKSAVANPSTLASTPSSSSSPPTAATSVPPLPAGGTGSDPDEYQDYRKRHRSTESQRRQRI  
NDATEQLRELFAIDGKAERALVLEKAVNKVQRLQDEMRLAEQVQTLQQQLASTPSQSLAPNSGIKQEE  
EEPATATASRLSSPLTTASESDSQVDDTVTIQPSALYDSFDPDCLTVTTSAAAQELRAGEWHPLPNALSP  
NPEYSSTDRGVTVCVTVGVFLHGDNRSPSTSRAPSPFHVSLEDRGLDESDFDVTQMEELASSILAEARL  
QLTRANVPDPTNLESSTRSRSGQYTNQQTTFVDFGPDLRNPDVAVSCPLVQALLRRLLEPELAAICQTV  
APIDALQORLQTTATQMRRLHIMQTKKEYAALKHLLRRSSTQIVLEELSQYQRMYPHNLQSLSNPVALC  
SVSSHGVMMLDCNSKALKLLECRDDVIGKLLWQLKINPDWRVRKTQSVELVTGACSTIITVERVRTLHTR  
SLRWVRQTLAQCVPSPDIDGCVYFCLAMLQPLDEAPSIGPHMLYRIAQKASSSFFIVLSLSLSLSLSLS  
LSLSLSLSLFFSLQCRLLS

>Mb8\_GroupC-like-2 26679

MDEVTCEARFNVGRFAMLPGPSHEFEKWRRSVCVCVCVCVCVLSINKYCWAFPCVCVCVLCVCVCCTA  
CERRSGSLTNTDSFFLSLSLSSLSLSLSLSLSLSLSLSLSLSLSLSLSLLRRLTHSSGLMDARAPKRAH  
VIARGEGTGGQTRSQGRSQRNVKDEDSVPEDSADRRLQHRKEAHRQRINQALDELRELTSAHS  
DEKSTVLNRTVQLIRTLQENQRLRAASTRPEGVNPNPTTPAQPFERPALHHLPPSIQSTAPASQGVNL  
LPNGLQQIHNGSQGHSHGSPRLFSGNTTPRSFADLESTLDLPLFANLPLPLEDLDLSDLNPGDGTGCVYR  
HRPSLGAGASGIGAGAASGSASSANGGPAYQRPDADTIRGEILQFVSQREAPLDQFVLPYPLGLAYVSTR  
GVVLDNCNRAFLDLYELERAEEVGRFLDATNTLVDPATGIGELRALVQQRDVVAMVRRRLRPRSQGI IWV  
KETYRRHGHPNSFGRRLKYGFGTFERVEPPEGGMPLVLPPEQLGNSRSRSD

*Mef2*

>Co\_Mef2 CAOG00636 reannotated

MGRKRKRIQIKPIFDDRSKQVTFTRKRLGLMKKAYELSVLCECEIALIIFSNQNRFLFYASQDMDNILLKYT  
EYSEPHESRTNEDLAAQIAKKEARARGDSSLRDSDSDTDGEDGIQSLDQKRAATDQIRQDFTLQSQQQQ  
HHSTISANRIQQQLQATSNDALQQLHNFQQQQQQQQQQPFSLI PPAYVPHPETLNGQPNLVFAPAPLSASS  
MPFGSALGSAGYFPSYNLGSAELANAQAGSTLPPHINLGAAPPFYTPQFAQGGPAGASATMPTPPLPPP  
VTTAKSRGKK

>Sp SPPG\_03091

MGRKKIAIKRIQDERNRQVTFSKRKFGLMKKAYELSVLCGCEIGLIMFASNGKLFQFASTDMDKILLRYT  
ETEPHESRTNDDIKTIQKHGSGGGDGGDDSDSAERDDNGLIESTPRDDRSMDHEIPSPRSLRLARRKS  
DKDTSKKNNSGKGGGGEGDDVESNHGDQGREYLSPPQGTPTHDMRHPPPSGFSHMSHLIHPPYTAVYP  
SFAPYPAGFVLATGHHHPSPDSEGSPPSYIHG

>Am1 manually annotated

MGRRKIKIELIPGERTQATFIKRRMGIMKKAYELAEELCGCQIGMLIFSSSGKLFESSTGDLDLSILRY  
AEYTQPHEIRTSRHPVRELLTLGCRSSTRSPDSKMRWARPPRTPTRILTTTTTWSRTCLCLPRIWLRLA  
LSRPWLRLRRNPRRMALLLSSGSSSKSSSSSSSSNSWSALLRRQQQRPAPCLGTVPPLTTVYQAKAC  
STQAVQRLRHTSTRPRAIRAITRSRGQRLLRNICIRTRSTQRLCSIHRLGRLSLHPRLLRRRRLMGRHCT  
LMVRCTLARSRSTIIILTTTRIRRLWRLRPCILILLRRTTTHTLTWRRIPLTDRLRVLRIMHPTLPH  
HRLTLGRTRTRTMRGPRSPSCPYPATDLPFRFIDPHPHATPGSPLSTMAAQMDPSRTVHSPVLKRSASD  
MLDPAEAAAALAPTTNEPRASAKRKPFPFASKQPFSLRLQIPTPTSAGPTPARAVDVLPSAGSTYSPPHIG  
ASTTPLHPPHDHAPIAAASPTVIPASPHVQPPPQPLPHPHAAASSAPRGSLLHAHHAPPLSAHSPLAQ  
GAPYARLRGSPPSGLAGTRPPSVPGREATVAPGDLGRHDLR

>Am2 manually annotated

MWADLRMLSPHAPVATLPGAPRLGVDRLSPRACLVKKFDIVCRLADFLKRRRRREGNGRAALAWLATT  
TTATSLSTNNTRTAADGEYRQHERPPDHPQAAHPGRPNAAASRAGRHDPRILGAPPPTTAARQLAALHDD

TDDQPAPAAAAARATSLRTRLRARSQLVRASIPILPLPAHPNRRRTNQRPRDRQSIMGRKKVRIQPIADARPR  
QVTFIKRKTGLLKKCFELSTLCSCDVAVLIFSATGKLTKEYASNGDLDSVLLRYTEYTKPHEIKSNQDFLD  
DGAADKSKSSAKSIRNDDDDDEAGGSDHDGAAVSAAGPSGTANAGPAVTPLLAPNPQSIMPAPGTSVGM  
HHVGHHPQAGPYPIQLQPQQQPQPPPPPTAQYQQQPFQTHGAFYGHVPQPQQQQPQAPPYGGGQDMTGF  
HAFGAAPVQHHPHQHHQQQHFQGTMPQHSQQPFQPPMFPNDATAAAAMYGATTGQVSVPPQLSYTVDPAT  
GYVTAVDFAAAAARGNANDQYATYQAGGMFHPQQQQQHPQPFPMQPPQQQHPYAVQSHAYAQPHTQQHH  
PQQQGYLMQMPHAQQQQQQPLQPAVFSGAPTQLAPAAEPTTGFLSYDQVPPSSSGPMGLTNPLTQA  
TQIVAPSPASTAAAAGSPALTAAGISPAAMTARAGSASVAPSPLVVGQKRARGDESEVDRESTSPQSAKRK  
PHFARRAPFSLKVHPIPGTAAGEGDTAAGAGAAVAPLTLNPNPTTWSPLPPPPPPMRSGTSGSNGSG  
TGAATTTTTTASRAPPAAVAVRPSSVAASRPDLPALPASAFPPLSPYPAASTAFRGAAGSSAFLLP  
PPSASATAPGPLSALLQRSTAAALPSPSAFVPHRGSLLGGASLLASPVFPLGVVPMPAISVSAAS  
ATGRADMQGSRYEAGEEKEEGGESRVKVENEDKGGAGASEDDIEKTVQHEVHSGVVRNMWKSFVECEQF  
GVLEDSRPETRCYCLSR LAPMRHMLATILLPPAIRCASSTLMPYKLVNLSVSTSFATVLSSTPANF  
TMNGSSNDQFQSTVPAAPNPNSTNLPAPMATVAVIAPTDRHGRLEVGNGLVADPLSDAPERPLPPPSL  
NPSMADLPEIDYAAIEAYCQIPEKDRVQHWSEGTRMVLPRVDGGVIVTSENDRATTEGRALDVEGINRQ  
LHVIGRHRSLTEAPFTIQRVCELVLFPNGGQHKLTLEKYLRAIEKVVGVSSDWPMPANGMALDEPTPTT  
S

>Am3 manually annotated

MRWDAGRVARVATPAGACPAIPCACRKSVPVACTPPPTLRASFKSRRPARDAPLLLPPANNCTCLLLP  
PVVRQPHSRAPQELKSVPAPIILVVATPQVLGPPSSTADRVLASLASAPGFAGHSQPTPELLKSGNFKATR  
LGALLIYSARFRQLIWQPLATSRRPIGFIAFKCVLLEKGVACRRVLPVHLHQFVNWPKLRESACHGPA  
RHHFPFALAVLAGGASSCAVCLPATQFLTRGTCGRAAPPKRKYTIQPIRDRSRQVTFVKKRGGLLRKA  
YELSVLCGCEVGVVVFSSKSGRLTTFASDGLDSVLLRFVDVAVPHETRNLDFLIEDGHLPPGSTLDDAK  
NAFIEQFGADNQPAPPAATAAAVPPPIPLVATNAQQQPQDPTALPTPAPHAAPDAHPATATDPASRPIL  
MHPMPFGTYPAPPFGWYHGAPPAPFMHPAYDGHAAAAAARPYSDPMLPPTTAAPGSADAR  
PTAAAARPETTSPDTPISVAPFSAAPMDPAVAGYPPRYPGYGVMPPPVPIHPYAAAHYPPRYAMR  
PDYYAPYPHLMEYPPVPLAGAAARSREPTHRPSPPPVVPVTSAAYPAAQDPAAACAAAASASTAPAA  
SAPGPAAPVVGALTAAPAPVPSGGATPLGTRAWDGSDEAVHPPAKRVAAGTENTLVEGSQDTSFSLSA  
AASAALAHHAAVVLTSMFGSTQAPTSTAPAAASGPPSAPAAPEAAAPVHLPPISVPEDHAGAPPREWPGK

### Fox

>Cow1 CAOG\_00937

MSSSGGFVPSFGSSAAAAGAGAGAGAAAASGLASSGSVPTTDELSELTNMLLLQOQQQSQSQOQQOQQOQQ  
HYLLLLQOQQOQQOQQOQQHYSSLLQHLGTANGAGAVASSASNSPGSPLLGTAVSQOQQOQQOQQVQNSSAT  
VQELAKORRAQSLAIIQQRLEQDWERQYIQHQSHQOQQOQQOQQOQQHPAFAAQQQRQPQSFDDLS  
TGLAESAAANVSSFMAGFDLSELNLSNSVSEAAARSLLLQQTLEEQNLQOQMLLSQTLQOQQYDQLOQQ  
LLQOQQOQQOQQOQQOQQOQQOQQHQQOQLAQDFHLDQAASFASADQLPPQLLYSQNQPPQVFPQQAHP  
PQPALPRAVTPTELEFSSMPTSATSLNGLNNGSMFGAAPGAAPSTGSAFTPLSQHPSLTLNLSASPNGS  
GASTPTKGRSRRASRASVSKNSALDLIATSMLATIQQSQPHGQQSQSQSQSQQAQQQAQQQAQQSQA  
QSSQASAPAPQPHDQHAGHPLTPAADSDVSSPANNDFFDIDLGALEADYNEHLGSDSPGSSGPGSGGK  
PPFSYATLIARAIQSTPDHRMTLSNIYNWISSENYPFYQTTSTGWKNSIRHNLSLNKCFKRVTREREDPGK  
GAYWTLDETQTTDLSSRSKQRRRSRSNSASKGMPYNDPIKEGIDTNYLPRKPAKLIISGNTDSEQSS  
QNSSAINTPTMSSAILNGGGDFGFVDDLNSFKLSLHHSVNLSGTLPERIQLPGDDVTDTAAMFVGMPL  
AADLSLGESTDFLNEQLNLLLAQQOQQQPHPSQQOQQQHHQOQQOQQQLQHQLLQOQQOQQLLQLLQOQ  
QOQQOQQOQQOQQOQQYQLQOQQOQQOQQOQQOQLQHYYHQOQQOQQOQQOQQHPMMS PQFMAPS  
PGSLRTN ASETGSLADLRNGHNRRNVEDRKNALASRSASAMPTLSSLGRGRSPLSPQALSGLMQMFGPGEGHSG  
FSNGAGDVDPQSLDPAVRRRISTGSLDSNAINQAHQLSFMHSPQMSPGAYSQQQTQLVGTTPGDSARLTS  
GTSNSL

>Cow2 CAOG\_05750

MSDSAAGAGAVAAPQOQQPPPPQQLYMQOQQGAPQPDYQQQPQQOQQPPYYMHGAPMHPNLNYMQGGYPQ  
QQPQQPQFMYQQHQSSQDPSFTPQQPQQPSQQOQQOQQOQQOQQOQQPSQQOQQPSGDMSSQOQQOQQOQQ  
QQPMPQOQAMYPQQYYPGQPPPPQMQQPGPYMYAQPPQAFAPMGYNMYPNPYQPPPPPGMAMAGMV  
RPGMPNPPHMYPQQPPFVNGHPSYGMDHQAQPLFAPGGLPPPPPPPPPPPPMPPMPQVLGGPYMM  
PPHPSAMPHPHPSDPMGAAPPGSGEGIPFEVVEPTAFQKLGQPTIDYCIIRSLSVTLGRKPSHNVDSDV  
VDLGRSKFISRRHAKIEYNTMRHFEISALGKNGLLVDNEFCNNASAPVPLESKAFIQIGDVGFYFLLPL  
GTVSQNVKPTKKKLQVAVPGGDEDAPHSDLGGIQLGSSASGTGNFSLPSYTPPVSKARAGAAAGSGAG  
GDGVSPHSPTGTLSPNESDEEGHDNGLHPPQSLVDYKGDPSVKPPFSYATLIAQAINISADRRLTLNGIY  
TYITEHFPPYKRVNDNGWQNSIRHNLSLNPCFVRVPRPDSEPGKGFWTIDPNLQYMFDTDNFKRRHNRAP



>Co\_SSRP-1 CAOG\_07557

MSEGVQFNNSILLKSKGLFKGMVQMVEAGVAFKNQATGAVTLAASSDLRGFVAFHRAATGYELAIQLPSSK  
LRLLGFKEAHLTDIEQYVSSTFHQTVQTSDIATKGTWGWGEPRFTGNGLAFYVDGKVFELPLSDVVSQTHM  
KKNDITLFEFKQDDPNDDDDQQLVNMRFVHVHPSAVLESEDPVEKARREERKKRERIERDKRNAARARRNDL  
RRRRREAEQSTIMQVDGEEPAPTQVSSDEEDSASEPEEAEEGVEGDEHELVPVTRLFQRIKLVKVDVAHTAG  
DVIVSLLDVCNQTTPRGRYQMDFYPTMLTLHGQTHDFKIPFASISKTFVLPHPDQFRVFFVVLALDPPVRQG  
QTPYPPFIVFLLQTEGREISVELNMTEAEIAEKNLQVSKLINKNVREGDAPKPNHFAITKEMSGGEVMILA  
RLLSAMSVRLPIQFAAASSKDKAYSEQHGYKASYRASDGYLFPLENAFIFVHKPLTYIHYSDIKTVTTFER  
GSSILKTFRAFTIVTHSGTGFTFNSIPKEEQRNLEQFCNAKARSKGFSVADKPPARGAAAAAGDSDDED  
GAIHSDDEENDSYKRRMKKEGHAREIAGDDYDSEDEDEDQANSDVVEEVGEEFDENYSSSDSDSGSDSSD  
SGSGSEDENGEPKVKKAKKHKKEHKPKPVKAPKSSSPTKKAADKKNAPKKPMSSYMLWANENRAAFKA  
KNPDANVMELGSILGNAWKELGESEKNSWAEKATEARKAYEITLAEYEQKKKERAAAGEPMDVDEEPAK  
KKKAAASTSSSSSKKFKSEEFIEDSD

>Co\_SWI/SNF CAOG\_00396

MLSFYTFALPAAESTSDEEAYSLLNQVNPVIQNNRQPPTMLRGSKLKHGKRVFGMYDLAPFPDDGYSWTQ  
QEAMRDVQINGQLAMKVFETSHGVDDAAPHIEVTRKRFFALLPPGGLTMEMLQLPLLQLVHYTYVSKGGVD  
AAAMQRLQAVQQQQQLLQLLQHQKGSAAPLPGAAGVQIQQLGLIYNTLKQEI AKQQAAGNTPDPELLR  
RLAMLEAQLTRHQQQQQQQQQQQQQQQQQQQQQQQQQQQQQQQSQTPAQPSQPQQQRAQQPSAAMQLQLHQ  
QQLQLLQQQQQQQQQQQQQQQQQQQQQQQLLQQQQQLIQKAAAMQRAQQAAQAS PQAQAQAQQQQQALL  
QQARNQAQLQQQLQLQQQLQQGLPPQQEQQLLKHLLQLQQQQQQQLQQQQQQQQQQQQQQQQQQQQQKAAAS  
HSSPAQRTPAQAATSHSQAGRSSAASGQPAPDPRLVAQQQLLLRAPALNLPERPTPPTPPMPQTKFTQE  
RWDSVRKQHPEATPLQLEEIIAKEWAELSAEARSVREHEWDRALAQYDLGVAEHENSVAFKKWATAMKDA  
EHQIIQWKRVSQQLLQQQAAQQAAGRPTQVAPAVVDEESE PYSIRQVAASRYRNHELMAEIVDTIPMD  
ESEASSFLASGVSQHQLFDEECQQMEEDAQAMESRAAARLQRQADDSNFLASLREIRHAGSLEDLNSI  
YHKQATGDL PAPHVCGTWRMVQLADNPVERDHTAALVAGCSSKPHLAL

>Co\_MAT-alpha-like-1 CAOG\_01776

MNHQAFGHMGSISGPAVPGSEHLAMSANGPVLARIAANFMSPTTEEQLRQMSLACKLATTQPNQPSQKP  
LVVLRRIAAPQSPTPVSEPTQETTTTKRRGPNGFIVFRMTMKNHRYSHLPSRASSIELGKLWKQLSSDER  
VTFEMEAQKRELLQLNTNKPARATKVRKPRLLYNNRLTAAGRRQAQQVAESCLPRSFLAHETLHADHEMF  
PLDVTDASSLFPKSGKACDPPILSISSNSSTFSSTSAALSASDSSSTLAEPSPISDSDSSCSVDDWRN  
TNLEAPLHPRPFVRLGLSGQDDDCENISSWLLPAPETAPLPVLPAPHPKNLACQLAQRATFVSACHSPT  
LVCQSPVPLPPPSIAIDMSWLDWAERDLAVRSVDSNQSSPTQ

>Co\_MAT-alpha-like-2 CAOG\_07895

MNHQAFGHMGSISGPAVPGSEHLAMSANGPVLARIAANFMSPTTEEQLRQMSLACKLTTTQPNQPSQKP  
LVVLRRIAAPQSPTPVSEPTQETTTTKRRGPNGFIVFRMTMKNHRYSHLPSRASSIELGKLWKQLSSDER  
VTFEMEAQKRELLQLNTNKPARATKVRKPRLLYNNRLTAAGRRQAQQVAESCLPRSFLAHETLHADHEMF  
PLDVTDASSLFPKSGKACEPPILPISSNSSTFSSTSAALSASDSSSTLAEPSPISDSDSSCSVDDWRN  
NTNLEAPLHPRPFVRLGLSGQDDDCENISSWLLPAPESAPLPILPAPHPKNLACQLAQRATFVVSACHS  
PTLVCQSPVPLPPPSIAIDMSWLDWAERDLAVRSVDSNQSSPTQ

*Homeobox genes*

>Co1\_TALE-1 CAOG\_08013

MSHISMDTSTSIHNSQNGVNLATSMLIQAASHCGLFSSCGTNDRAALSNRWREPRGYKRSLAESNETETN  
LAETMSTKCRIEPQSELQEAQAILDRLDNTNPWKGYIAAMAQQTGHVLDLKLVRWADSNHFPWDASVCSTA  
ARVGRDLVLQWARANGCPWDESICTIAAALGYRETLKWAQENGCPMNQPVCQAILRKGLFGNTSAPRPVS  
PNSYVAQQIRNNTPASNSAVSQSARALVAGSSGSSAAASVSAGEGSMILIPAGQTELGKNKTSKARSDDRS  
VRDSTPQLVAPERFDPWYSKYAIDNPQCVRHTAHLTKDERQNIKDGDFIFDWEVTRVRDGLPYHKGYT  
CCNGLVVYKSVHPGGLYRTVAKRPPFLIVFYSTRSPSQKPSFSQARLAAEHMITQAFATTTTIPFESRG  
ESDNKRFRFDDDDDEPSSPGSSSTLAPLVDNTPRRSNLRKASVAILKQWLLDHVSNPYPTDIEKDALAQ  
**ATDLNVSQVNNWFINARRRILQPLLLGE**

>Co2\_TALE-2 CAOG\_02804





TAYRVHPSLPWATLAWLASQCTAKVLF LAKAAMAYRQQQQHQQQMALQQQYRQQQQQQQLHQQQQLQQQQ  
QLQQMQMPSTSMMPSTSMMPSTSMMPSTSMMPATSMMPATSMMPANGGINPTMSANQRNASLRRPGAPSN  
LDLRAISNHSSPNLNP GALPPQQQQQQQLPGQP PGMGMQGPQRYLPQGSQPMVLPGGVVGRGAPMTNLG  
SRPGQAAPNGLQLPNNGSIASDASGGMSSLAGGNLGHDLGALNATSMSSGGATGMAPAHSETESKAALSRR  
RAIQQQMLLLIHAYKCKLPDKDDRNVPPNGQVCSVRYCKVMKNVLRHMATCRDGKQCSVPVKRPTVRFVI  
PCESRLTESDHRARREIKQSSEISSQQRGHLLPSEPIVLCFLFKQSRPTIKLAQVLPPLRLRLLLLLLL  
LLVQATDNESYYQKLAEKIYKIKKAKQDRQKRQATSRIKEWPRDELKHHFSPVLERLKGMSAAECFLRP  
VDPIELNIPDYFEI IKKPMDLSTIEDKLEKGTYPWEFCDDMRMLFKNAWTYNPKNHVVYKFTNEVSSV  
FEDTIDLVMKRLRFCCGKELTFNPQVLYCSVKQICPIRRDEEYMKYDANLNSAFNCCMACWKETEGEKST  
FTISAELTPDQKEYVGLIACNGSRRERFQHDPRSSRGASPYAVPFVATFRIEVSRTHTKAINNHIDYEE  
FVTCAGCGRRHHQICVMYHASICHEFICQACSKSNSATLSNPYP AHKLPRTKLSDYLEKRVNDCLHDETV  
SSPPEARVRTVRVHSSRERGVVVKDNIRRYADTEDPLPAEYPYRTKAI FVYQESSEGHEVCFFGLHVQEY  
GDDCPGNRRRVYISYLDVSVFFEPSSLRTKVYHQLLIGYLYMAALGYMYAHIWACPPAAGDDYIFHCH  
PTEQKTPTPKRLSQWYAKMLKAAKEQNAIHDFYDMYQYVCSRDIVRGRDLPHYFEGDYVWNRLESVQEID  
QADGNDGGMLSLDKVGKSKKNTKGGKKGKSGKQAADIDETLANRAWPEIEKNKSVFFVQVQLHAD  
PVNLPFTKADPDPDITCDFMDGREPFLQHCRENNHEFSTRRRALYSSMMLYKLTDESSGYTCNHCSTQ  
ISSMDFRYHCTVCPDYDL CVKCHKEGVHKHEMKQLGLGMAPAVNADGQKMTSQQSVETLRRALLALHHA  
HQCKNPQCDTKACQPQIKGMI EHMNTCNMRSSQCAQCKPLLTIVAHHAKVCNNSNCQIPLCRQCKARFAEN  
QRMALMRQQTQARRMNVMEHMNSTPAAAAPPAPAAAATDAPMTREALAIVLRHLPEKEQKHYQTAMLNQKK  
IKEAMAQLQAKIKAAPRDSAASKTDETHLKKMHARYIELRAFILQLHKKGHALAVNAGALPQLATATPSV  
AGAPRATPAKAEVSSAAATQPAVSGQGRNMSEKQRQVMIYVTKLAAMPPAQAEVELKRLPPNQAELLRN  
LIKARHEVRVGSWGIIRDDDRR

*LSF/Grainyhead*

>Co\_LSF CAOG\_06888

MKETSVDASQSRGADNDAALNLRALSSSLASAPAHAIAAAAGGGQTGDAQAE PMPDAAATAATATIEAD  
PLAALVRHEKTPALPPSLRFVYELNAKQTRSVTELPVTYLDRQRQYRLTLQALGHDP LLDASDQAQQHA  
QEDELWRQAPSSSALPTSTSARPSSSSFASIPTPGLIDVKPEVFNAAAASSMIDPADSTSSSSSALRSI  
IYVHFHDHKDELRETELWNNWVSETSQTSAVEIASSMSGIAEIKPVGPNVSVFWSAARGAAIYIVLNC  
LSTEVGASRNSKGVPLRLHIDTYRSSGDAPAVIGPNAARGPTTIQGMTLISSAFTMIKVYKKGAEKQFQN  
DLRRNQGLPLSVTTILSPAKAVPLPGGGASFVLLPKSPVTSVATKPDARWPAAPARPLGLPMDSPFSSKL  
ALEQQLRDSADPERFLLSPDLSDFLPNAMDVLSPGTIDALSDGLIQHASLKDYLLDDAIRSGHAGSPHQ  
GLLSREAHAARLPMNASSGLVEDRALSAFVSSVSSSLPGPEGHRNGSSSRSAVESHKQFLAAEELGFES  
ITASGNPSSGDFPATSSGAQKTHEVTAAWPSVREVDITNSPPFLAGRDDATFAKKMAANPATNFGELR  
FSPGISPQFVFTLPNSTTWP LNP SFLPMVDTPGTLPGLDGGAVYMSGLSTSPSTRRTASRVSIKAPNG  
AGFDSA FSPSQLTWLLRQRF SASVTDGLQDFSGEEVAALS RADLREIVGDI PAIRLQNLIKGSDQRAVS  
QSILKCIMVQAEQEQLYRRVYLQSTNTLESLSLGIATKFVRLPLRRLCMTTRRLDFKVAGLAKRLKITA  
QSPDVTDLPSGQPVRALASAEVEAAAAGLHIGAPT PETESDRSAVAMTGDAAESLLEALSLTPMI PSES  
HRPVPDARS AAPSTPAQKRRNDTPPSATSASEDDASMRSVVKGAPHTATASPLLGAKHPSTNDKLARV  
ASVTDTLQDATTIGTNTVHSDSRYSFSQMSRALPAASNQLQNSPNGAAGGVSTAFEETAASEPADAI FE  
DDVWEIDEDVILHEMDDNSRYIVTFRINDKEPGSMDAILRPK

>Co\_GRH CAOG\_04897

MALRAPLHQPP TLSQHLGIMSDSVSTTASTPSVATRSGGLKVDSSKKNLNPQPSTAGSLVKGSANAM  
TTTTTAPVPAPLVLSADTDMPEGFDMLQSTPLATLSATTMASLLQENADTPNSMGLGTFFGMDDASQQSQ  
LQEQQLQRQQLMQMRPGSGIDDLDLHVD FGPNGSFSGQAFADIRRPSSVASFQSNPASLHHGSVHGIPP  
SSNDLLYDMSNLP SHNYPVLPTEPSQSVFISNMLRMMLARPTTTPHSTQKYSFILDAPTSIAQKLEEGT  
LTYVVKQAYAVTFEGMRGRGSAGELPHTVKSIIHLVHFDEHDQKNERGLWEYWRWQPPTLRAMEVDR  
KTCGLTDINELAFNAFEFKWNPREGGKIVRVNCLSTEFSTQKGVKGMPLRIQIDTYENVTEPYETSMP  
VSRDYCQIKVFRDKGSEKSKDEAKSAEKKLLKILKQHELKYGERASEYPVDFPFCPPFNATLLVPSSKL  
WPKPALLPSKPQAPGGSTESGGTNTAGGTGSLSTSSGAGSSGTLTAAHTGAPRTAHPNASSSSHDVSNF  
LQPHSMVSPSSTPTSAPTSPGGNVLSGVHTGLTSKRSASSASLVDHAAESHTVTSLLPVM DNGIEFVMP  
RTKIVRVVSKKKEPVLTLYL RQEAERYFHSVYLDALTADDLRDKLADLLKLPAA SVREILRR TAKGVLVQ  
MDTKCVEHLENEDDFIVAVELQTDGWYRIVLRS GST
