# Supplementary material
Source: PubMed Central journal article supplement (PMC4342549)
Supplement: NIHMS62122-supplement-supplementary_material_1.pdf [file NIHMS62122-supplement-supplementary_material_1.pdf]

SUPPLEMENTARY MATERIAL 1

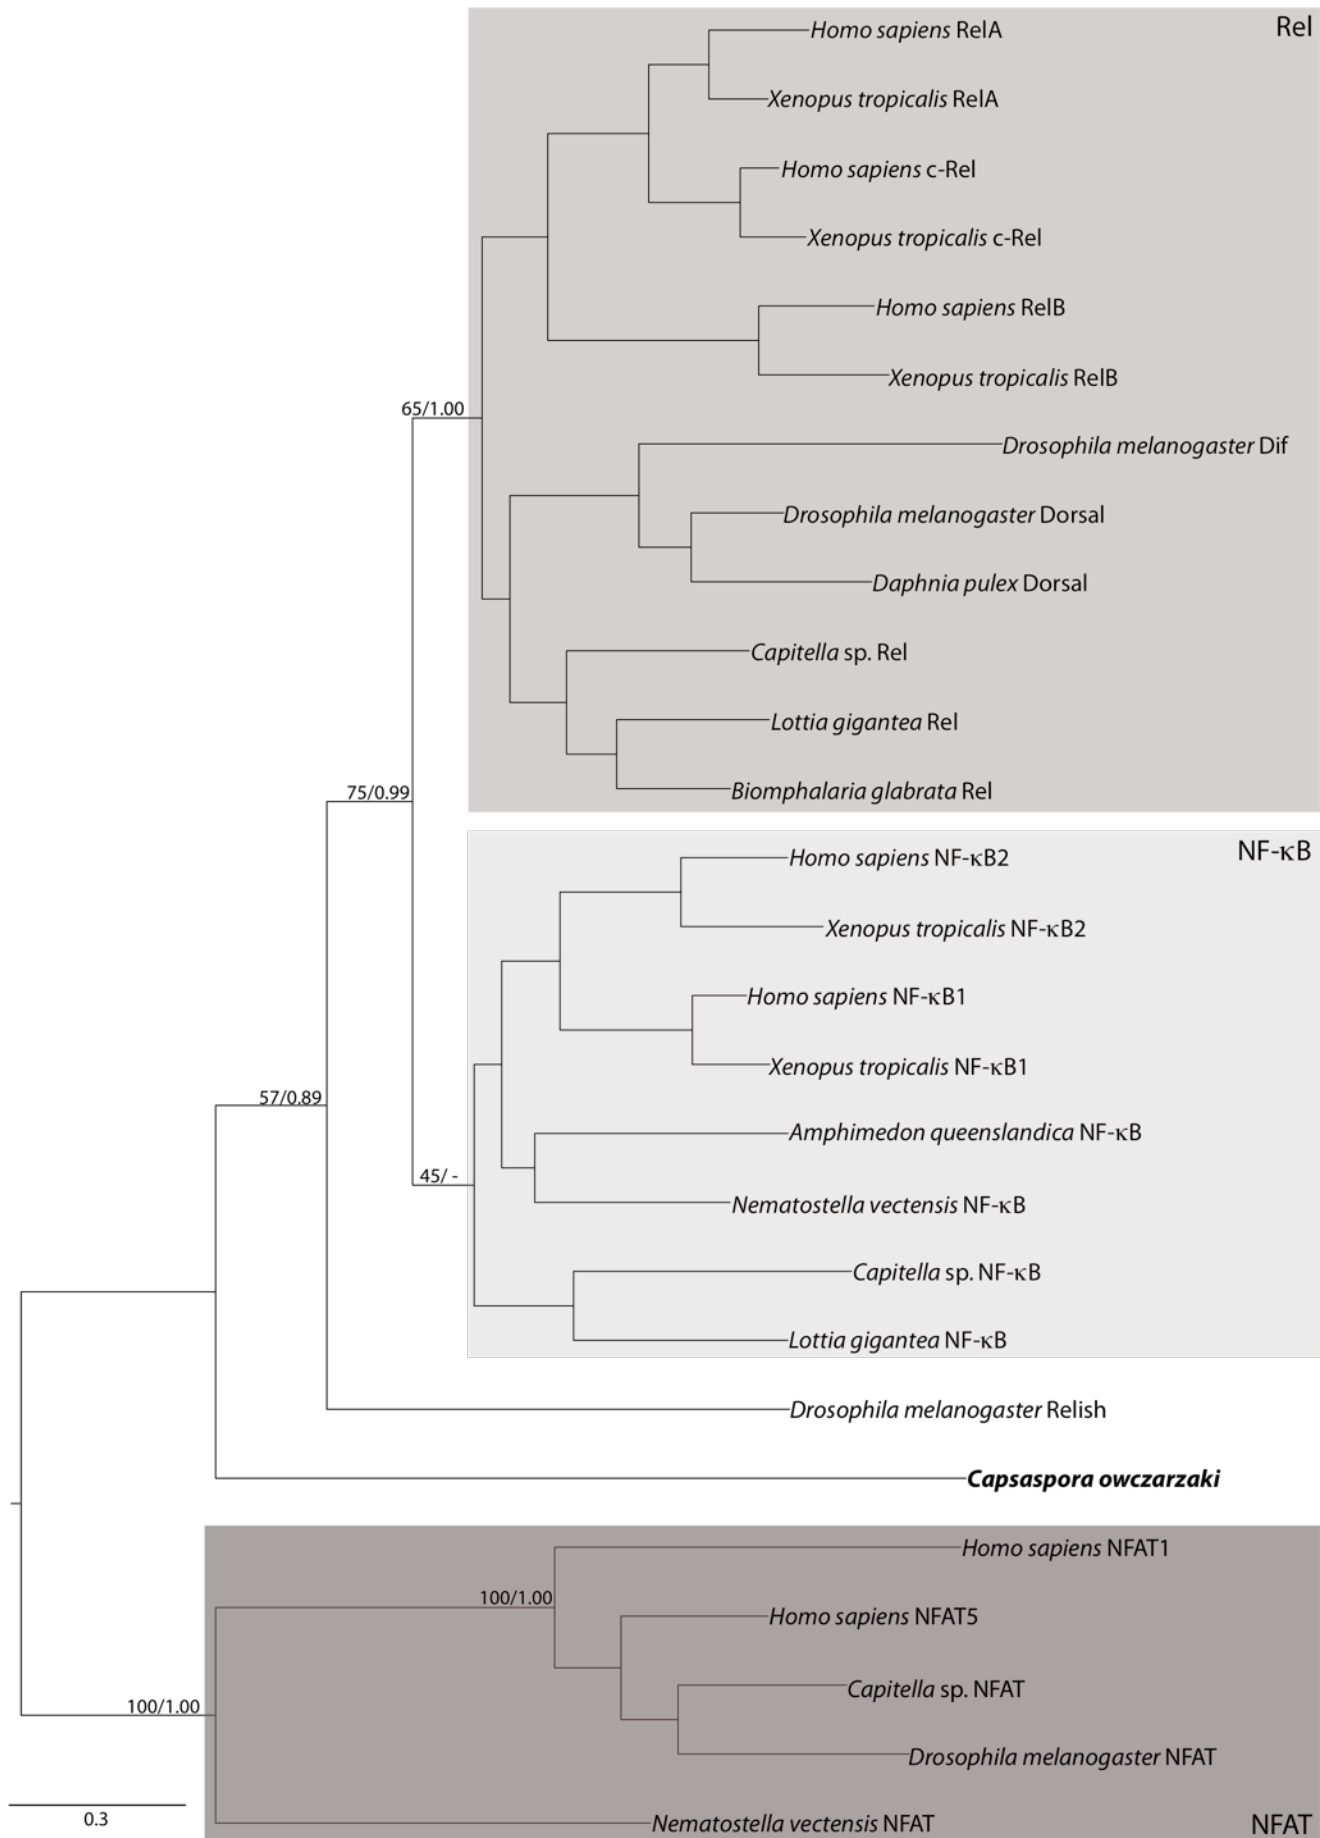

**Figure S1.** Maximum likelihood tree of RHD domain containing proteins NFAT, NF-kappaB and Rel using the common RHD domain. The tree is rooted using NFAT proteins. Statistical support was obtained by RaxML 100-bootstrap replicates (BV) and Bayes Posterior Probabilities (BPP). Both values are shown on key branches.





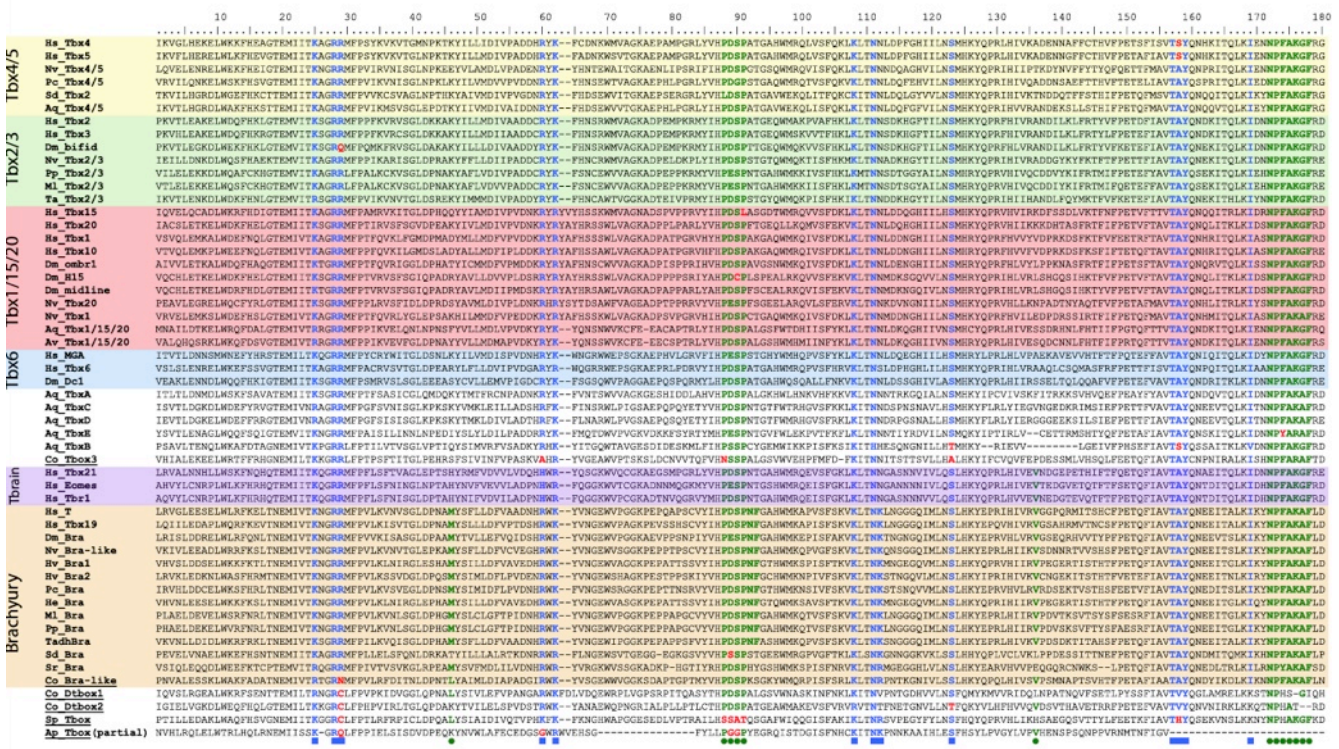

**Figure S4.** Alignment of the T-box domain with the different families shown in distinct colors. Taxa include Aq (*Amphimedon queenslandica*), Av (*Axinella verrucosa*), Co (*Capsaspora owczarzaki*), Dm (*Drosophila melanogaster*), He (*Hydractinia echinata*), Hs (*Homo sapiens*), Hv (*Hydra vulgaris*), Ml (*Mnemiopsis leydi*), Nv (*Nematostella vectensis*), Pc (*Podocoryne carnea*), Pp (*Pleurobrachia pileus*), Sd (*Suberites domuncula*), Sp (*Spizellomyces punctatus*), Sr (*Sycon raphanus*), and Ta (*Trichoplax adhaerens*). Key DNA binding amino acids are highlighted in blue and dimerization aminoacids in green. Non-conservative amino acid changes are depicted in red.

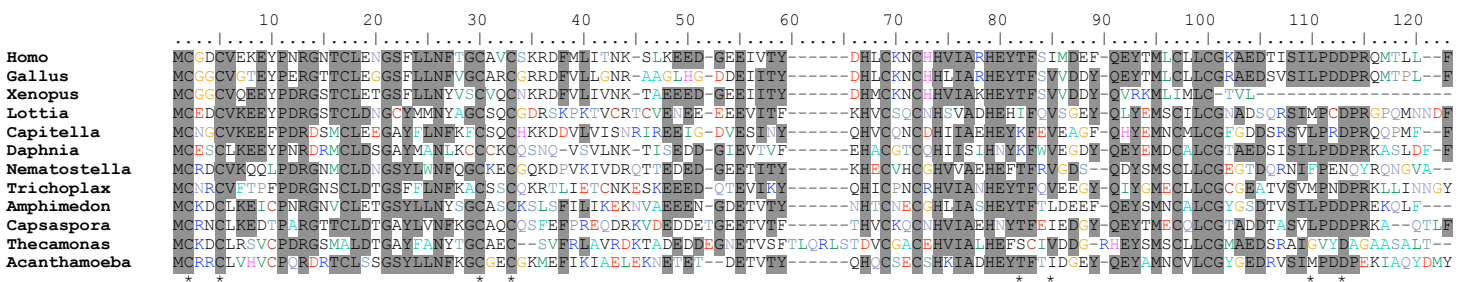

**Figure S5.** Alignment of Churchill domain. Asterisks indicate the CXXC motifs of the two C4-type zinc-fingers of the Churchill proteins (Sheng et al. 2003).

```

      10      20      30      40      50      60      70      80      90     100
Hs_p53  GSYGFRLLGFLHSGTAK-----SVTCYSPALNKMFCQLAKTCPVQLWVDSTPP---PGTRV
Hs_p63  GPHSFDVFSF--QQSST-----AKSATWTYSTELKKLYCQIAKTCPIQIKV-MTPPP--QGAVI
Hs_p73  GPHHFEVTF--QQSST-----AKSATWTYSPLLKKLYCQIAKTCPIQIKV-STPPP--PGTAI
Dm      GGYCFSMVLDEPPKSL-----WMYSIPLNKLYIRMNKAFNVDVQFKSKMP--IQPLNL
C. sp.  GEFGFSISFQQQSKET-----KSTTWTYSEPIRKLFRMATTCPVRFKTDLQPP---HGAVI
Nv1     GELGFCVSFGPPTESASK-----SATWTYSEKCKKLYVNLASFQPIKFKTTVKPP---PGSYL
Nv2     GEYGFDFVGFDKENGPTPK-----SAPWTYSHQLQKLLCRMKCLVPVRLVFRSKVPP---EGFYI
Nv3     GEYSFKLTLETQPKKVA-----NPDWIYSTQNKLYIKPQTPCPMKFVSVTGCVV---PGTFI
Aq      GEYGFLLILNDDDNSKPPK-----TVPFTYSNLMKRAYIKRDSTVGMFTSFSKVPV---PNAVI
Mb      GPYDLQLDLIDENSLKPRNTSPWTVSTPGLDLTLLQNGSAPIPISSNSLHVPCRWPVDFVLLMIQYSPQLGRFVHVNADVVLKIVLARAPP---KGTDL
Mb2     NPAGFRANLADSSVAAGPGA-----RAIGWTYSPIIINTLFTPMDYSCPIRFATNESVP---DLSRI
Co      GEAGFLLSVDVSNARHSAI-----SSAYSSEALGTLTFNFDVGVVFPVFRVAKPEPTVHP-LHI

      110     120     130     140     150     160     170     180     190     200
Hs_p53  RAMAIYKQSQHMTVEVRRCPHHE--RCSDSDGLAPPQHILIRVEGNLRVEYLDDR---NTFRHSVVVPEPPEVGSDC-----
Hs_p63  RAMPVYKKAHEHVTEVVKRCPNHELSRFNEGQIAPPSHLIRVEGNLSHAQYVEDP---ITGRQSVLVPEPPQVGTGF-----
Hs_p73  RAMPVYKKAHEHVTEVVKRCPNHELGRDFNEGQSAPASHLIRVEGNLSQYVDDP---VTGRQSVVPEPPEVGSDC-----
Dm      RVFLCF--SNDVSAPVVRQNHLSVEPLTANNAKMRESLLRSE--NPNSVYCGNAQGGKGISERFSVVVPLNMSRSVTRSGL-----
C. sp.  RAMPIYMKPEHVQEIVTRCPNHATTKHEHN-ENHPAPKHLVRCV--HKLAQYKDDH---YTLRQSVVPEPPEVGSDC-----
Nv1     RGVAVFKGSTNLHDIVKRCPNH---METSQDQGEKISHFMR-SNNPSARYNVCP---ESGRHSILIPYTGPPQVGTG-----
Nv2     RAVVVYKQPEHFREVVERCANH---ITRQDDGHTAPKHLR-CENTKTYLRTCNI---LTGRHELMFPTTRKPDAGMD-----
Nv3     RAIPFIKLPPEHAKDVVRCPNHTL-LEQSNRDHPAMAHFIR-SDNPRAEYERCA---QSGRLSVKIPFHVTTQSGISEEI-----
Aq      RAMAIHKSPDLIGDILQCCPKHI--EDQKKRGHQFPKHFICGAAKTETIYCEDP---ASGRLSITMPESSLQAKSLTSG-----
Mb      VFRLRYALPEHRKTRVETCVTH---QQAGSHFFGAPHNHLMSINREHVTYDDT---STGHHYARVALDQFPFTDN-----
Mb2     VAHLEYTQTNQRNFVVRCDMH---RQGDGSG--PFAEHVLR-VNNPQANYHQ---RQERLAVSVPVASTRSGKV-----
Co      RATLRYKQMQFMKEPVRRCPHL---LSIDSD----LHLLRACDQDQTVYSVD-----YHGRASIAVPFTPTMQPLVPLINTLKAHVPLVTRHPSSTH

      210     220     230     240     250     260     270
Hs_p53  -----TTIHYNMCNSSCMGGMNRRPIIITITLEDSSG-NLLGRNSFEVVCACPGRRDRTEE
Hs_p63  -----TTVLYNFMCNSSCVGGMNRRPIIIVTLETRDG-QVLGRRCFEARICACPGRRDKADE
Hs_p73  -----TTIYLYNFMCNSSCVGGMNRRPIIITITLEMRDG-QVLGRRSFEGRICACPGRRDKADE
Dm      -----TRQTLAFKFVQNSSCIG--RKETSLVFCLEKACG-DIVGQHVIKICTCPKRDIQDE
C. sp.  -----VTNLFQFMCFSSCVGGLNRRPIQVIFTLEH-DG-RVLGRQAVEVRICACPGRRDRADE
Nv1     -----FVTEMFAFMCFSCPSGRRPEIIVTLEH-KDG-QTLGRQVVEIRVCACPGRRDRKSDE
Nv2     -----YFKDMFMCFSSCPGGLNRRPIVIFTLELS-G-VVYGRKVLDVVCACPGRRDKADQE
Nv3     -----IVHELFSVCNSSC-GGLNRRAIQVIFTLETGGGCELLGRCSITRVCACPGRRSKQDN
Aq      -----SVQAFFFVFPCFTSELHKGPGQVAQLIFTLEIGG--VLYGRAVVDIRVCASTGRDRDNDE
Mb      -----VYSVPLRFHCFSSCPGSIARMMQLMVYLEHSE--HILGITSVDCRCCACPGRRDRLSAE
Mb2     -----EQNELFEWHCLTSCAGGINRRKIRVFRLIDPDQ-NVLGVQHINVRVCACPGRRDRRTHE
Co      GEASRSNPYVCSMTWFLKFCYTSCTGGMNRRATEIVFTLEDSQG-LIYGAQALDFRTCASPSRRDKQLE

```

**Figure S6.** Alignment of the p53 DNA binding domain. Taxa include Hs (*Homo sapiens*), Dm (*Drosophila melanogaster*), C.sp (*Capitella sp.*), Nv (*Nematostella vectensis*), Aq (*Amphimedon queenslandica*), Mb (*Monosiga brevicollis*) and Co (*Capsaspora owczarzaki*). DNA binding aminoacidic motifs (Nedelcu and Tan 2007) are depicted in blue. Non-conservative aminoacidic changes are shown in red.

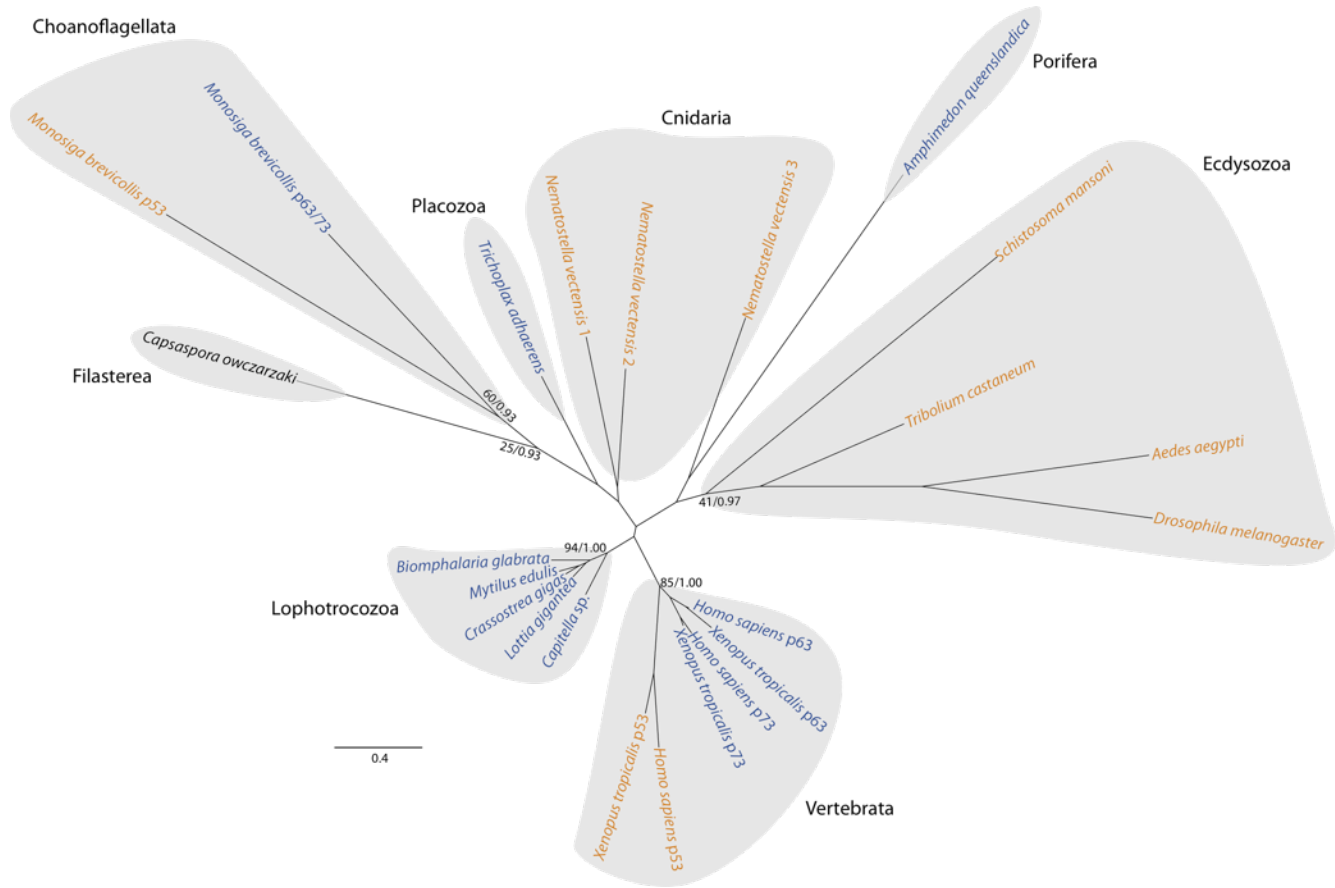

**Figure S7.** Maximum likelihood tree of p53 family. The tree is rooted using the midpoint-rooted tree option. Statistical support was obtained by RAxML with 100-bootstrap replicates (bootstrap value, BV) and by Bayesian Posterior Probabilities (BPP). Both values values are shown on key branches. p63/73 subfamily members are shown in blue and p53 subfamily members in orange.
