# Supplementary material
Source: PubMed Central journal article supplement (PMC4342549)
Supplement: NIHMS62122-supplement-supplementary_material_3.pdf [file NIHMS62122-supplement-supplementary_material_3.pdf]

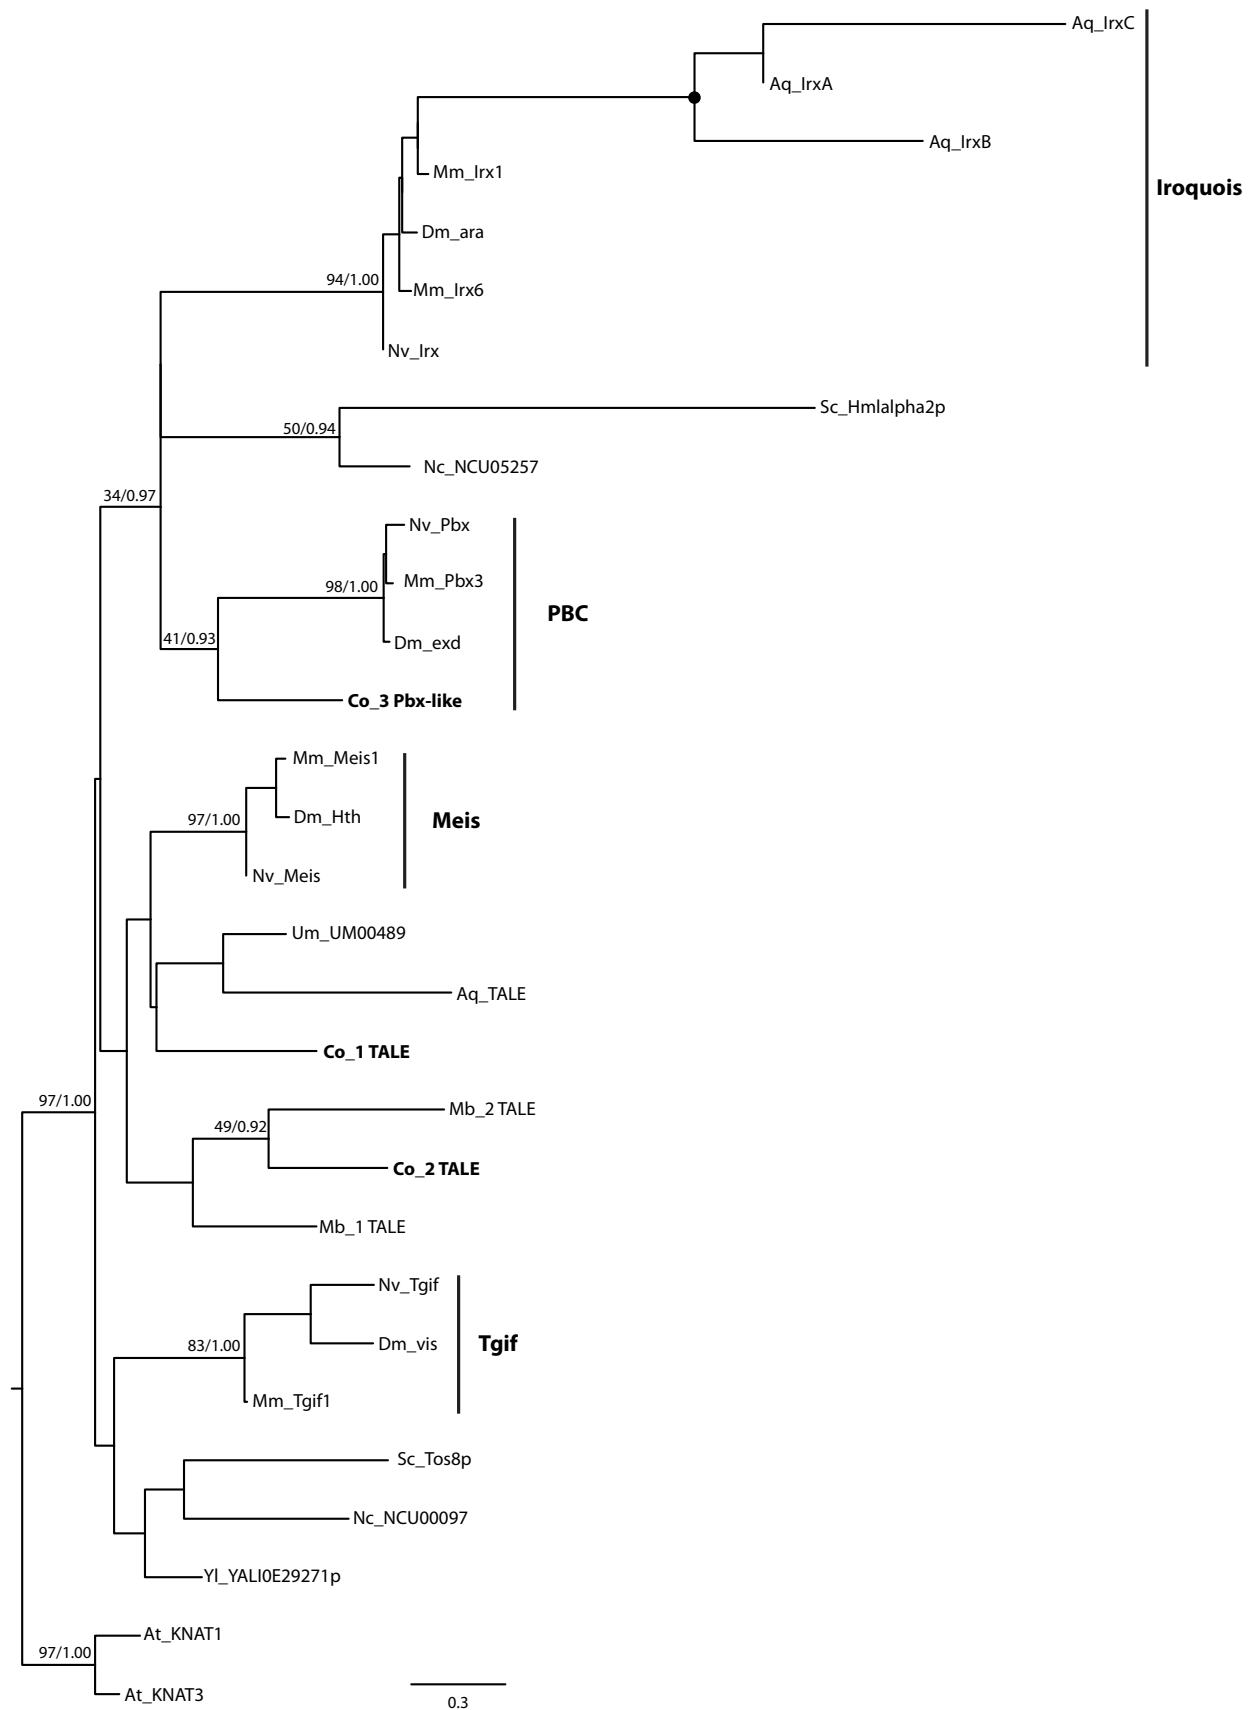

**Figure S19.** Maximum likelihood tree from the homeobox domain of TALE HDs. The tree is rooted using *Arabidopsis thaliana* sequences as outgroup. Statistical support was obtained by RAxML with 100-bootstrap replicates (bootstrap value, BV) and Bayesian Posterior Probabilities (BPP). Both values are shown on key branches. A black dot indicates BV > 90% and BPP > 0.95. Taxa used adapted from Larroux et al. Nv (*Nematostella vectensis*), Aq (*Amphimedon queenslandica*), Mb (*Monosiga brevicollis*), Co (*Capsaspora owczarzaki*), Dm (*Drosophila melanogaster*), Mm (*Mus musculus*), Sc (*Saccharomyces cerevisiae*), Um (*Ustilago maydis*), At (*Arabidopsis thaliana*), Nc (*Neurospora crassa*) and Y1 (*Yarrowia lypolitica*).

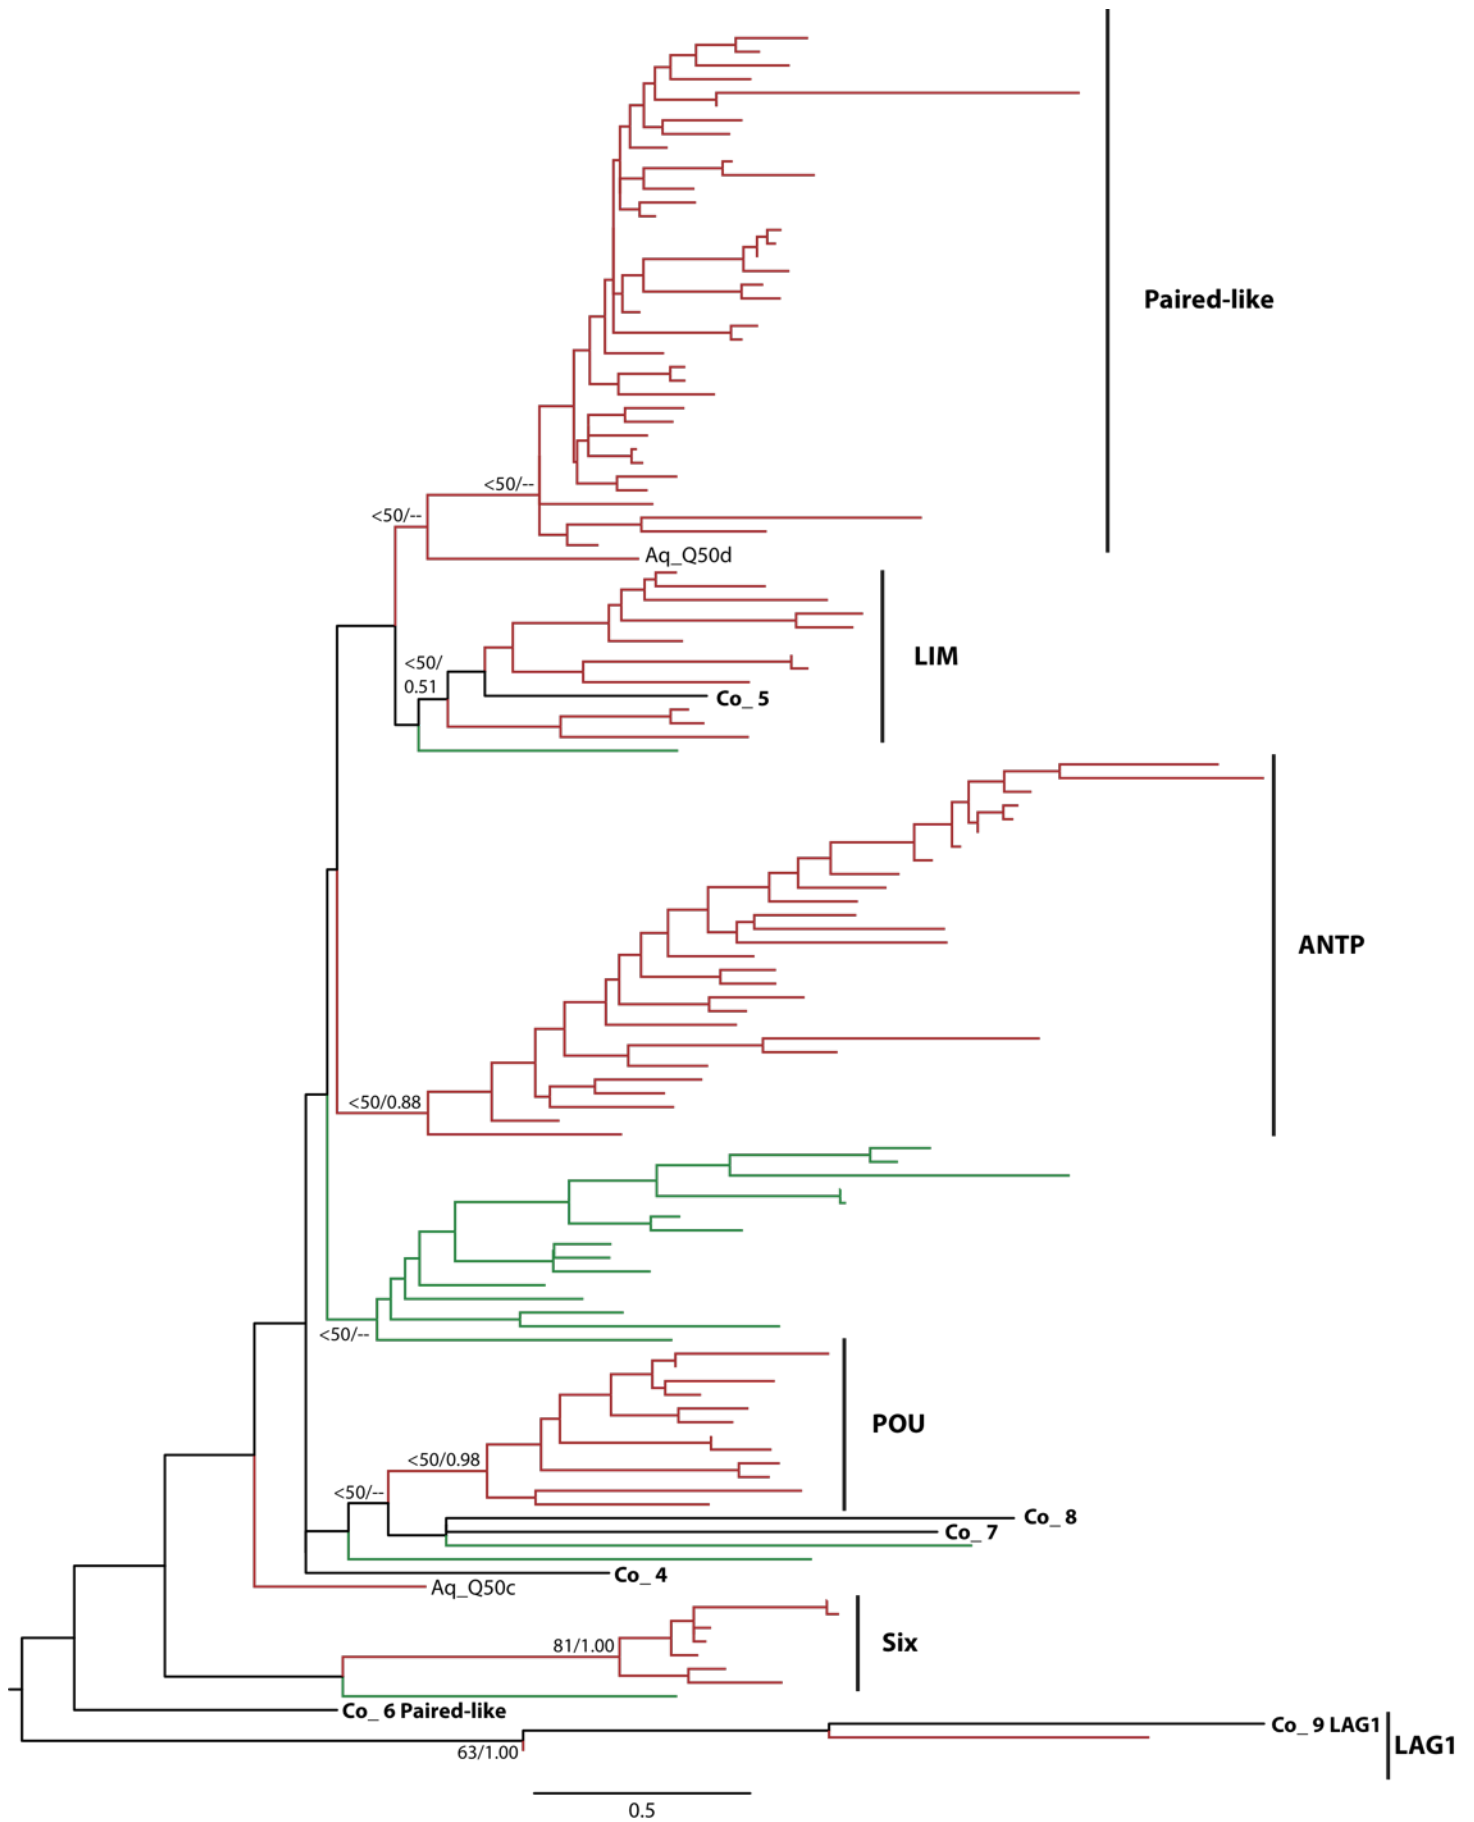

**Figure S20.** Maximum likelihood tree of non-TALE homeobox domains including all *Capsaspora* non-TALE homologs. The tree is rooted using the midpoint-rooted tree option. Statistical support was obtained by RAxML with 100-bootstrap replicates (BV) and Bayesian Posterior Probabilities (BPP). Both values are shown on key branches. Mb (*Monosiga brevicollis*), Co (*Capsaspora owczarzaki*). Metazoan branches depicted in red and fungal branches in green.

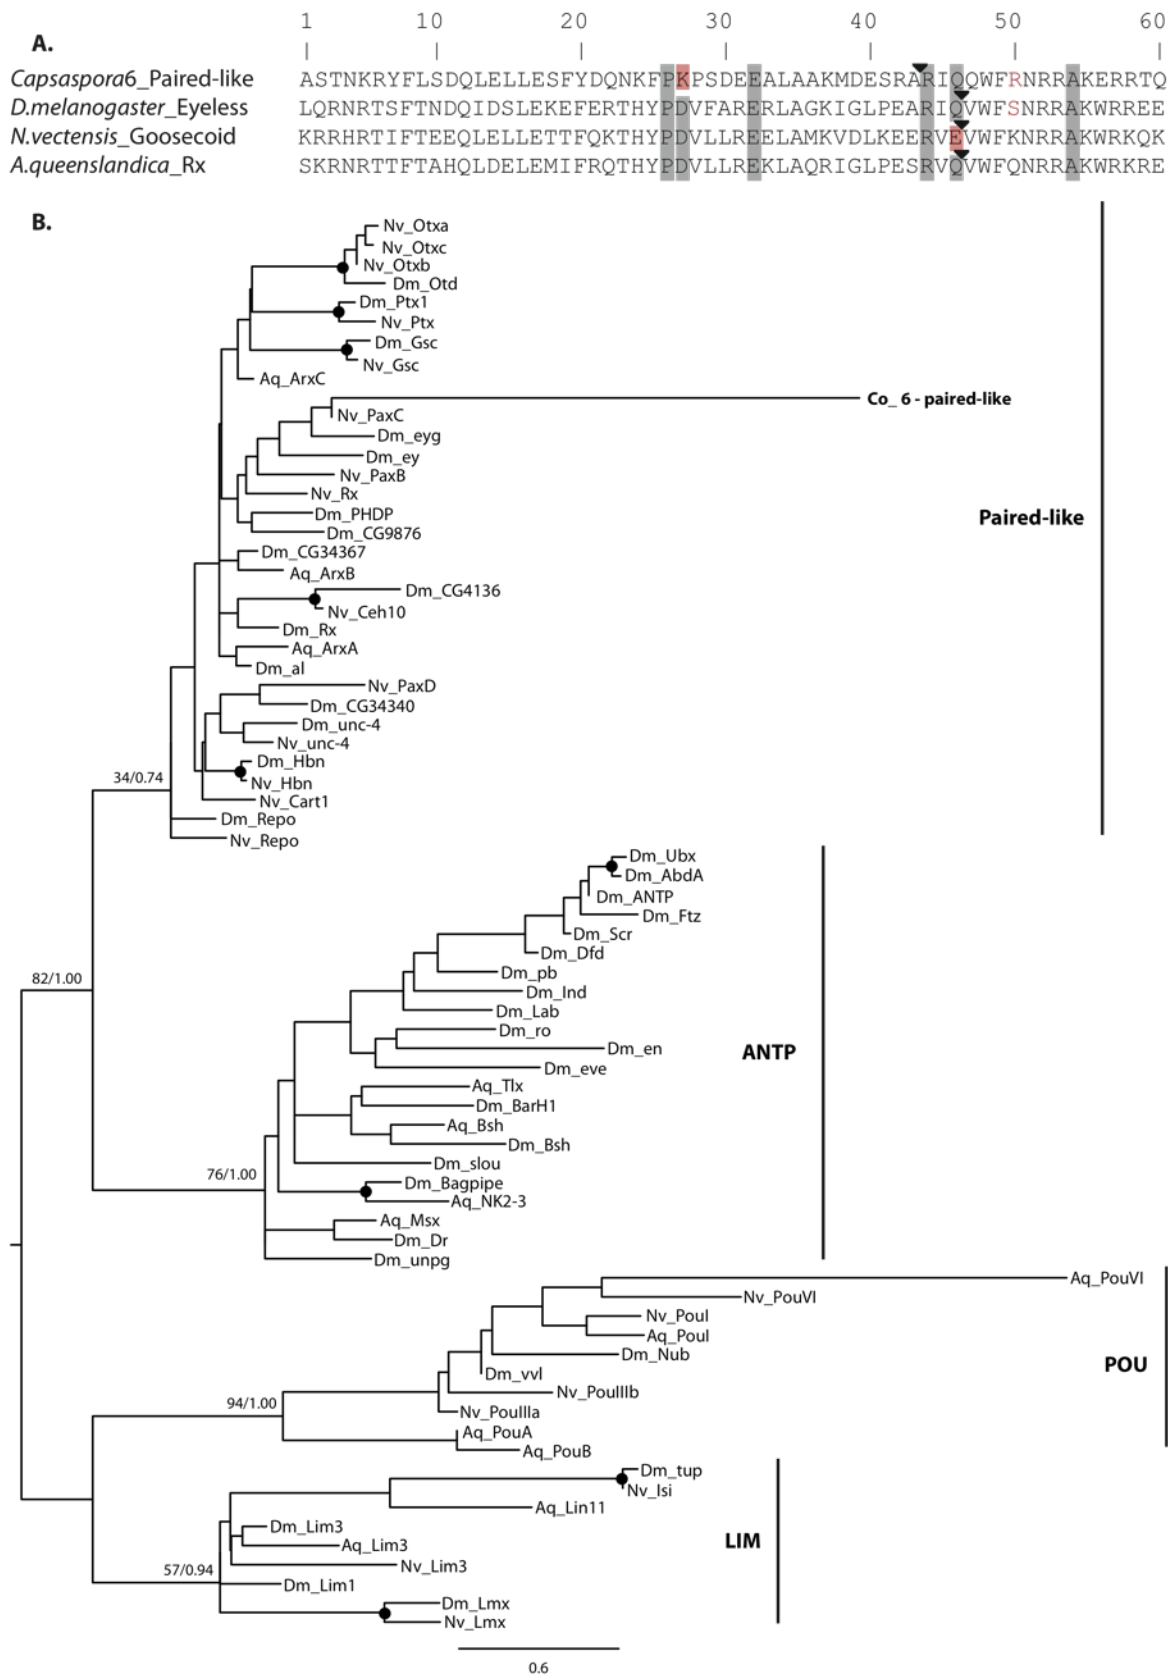

**Figure S21. A)** An illustrative homeobox alignment, showing the *Capsaspora6* with some other archetypical Prd-like genes from different species. In grey the aminoacids that define Prd-like class (Galliot et al. 1999). Black triangle shows the intron position. **B)** Maximum likelihood tree from the homeobox domain of non-TALE HDs from ANTP, Prd-Like, POU and LIM-HD classes. The tree is rooted using the midpoint-rooted tree option. Statistical support was obtained by RAXML with 100-bootstrap replicates (BV) and Bayesian Posterior Probabilities (BPP). Both values are shown on key branches. A black dot indicates BV > 90% and BPP > 0.95. Taxa used *Nv* (*Nematostella vectensis*), *Aq* (*Amphimedon queenslandica*), *Co* (*Capsaspora owczarzaki*) and *Dm* (*Drosophila melanogaster*).

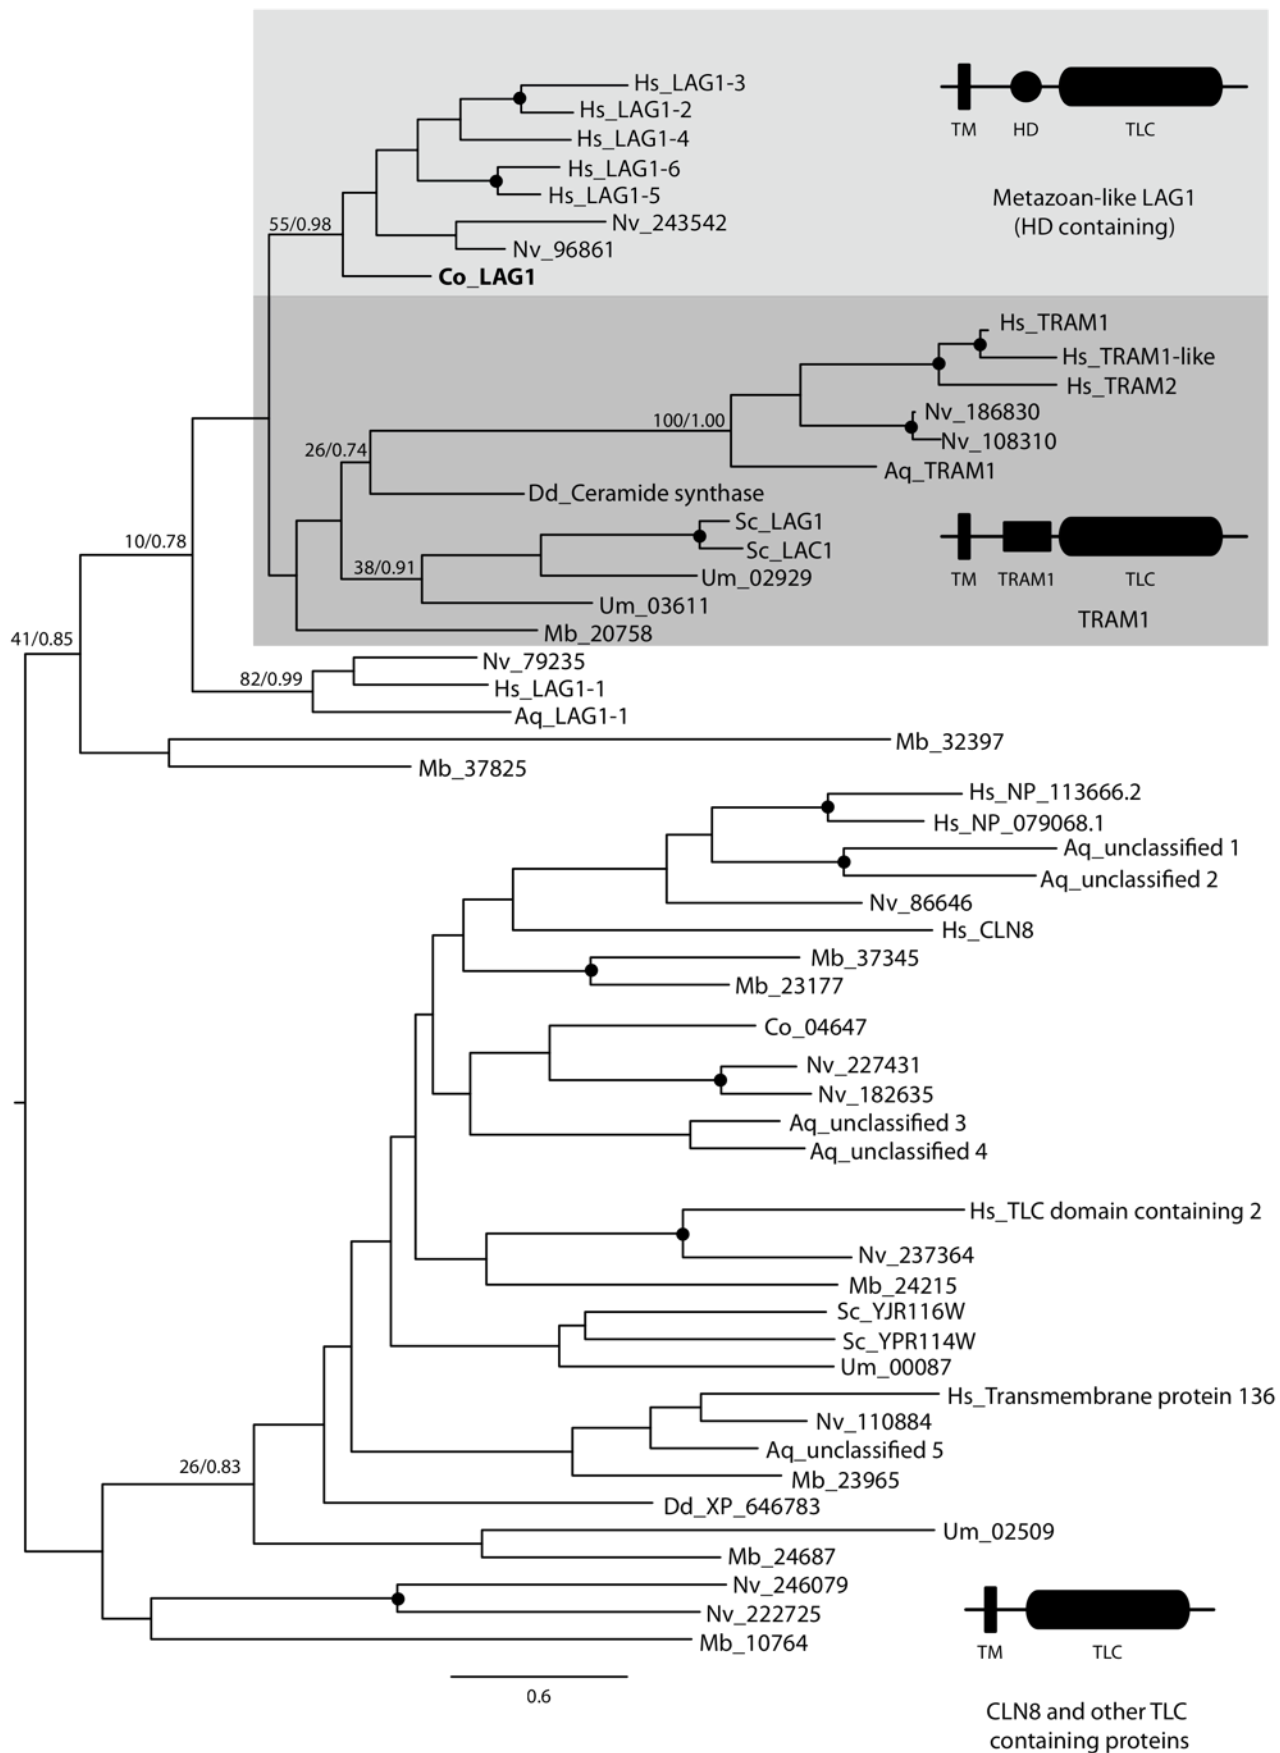

**Figure S22.** Maximum likelihood tree from the TLC domain. The tree is rooted using the midpoint-rooted tree option. Statistical support was obtained by RAxML with 100-bootstrap replicates (BV) and Bayesian Posterior Probabilities (BPP). Both values are shown on key branches. A black dot indicates BV > 90% and BPP > 0.95. Taxa used Nv (*Nematostella vectensis*), Aq (*Amphimedon queenslandica*), Mb (*Monosiga brevicollis*), Co (*Capsaspora owczarzaki*), Hs (*Homo sapiens*), Sc (*Saccharomyces cerevisiae*), Um (*Ustilago maydis*) and Dd (*Dictyostelium discoideum*). PFAM domain architecture displayed in the different classes.

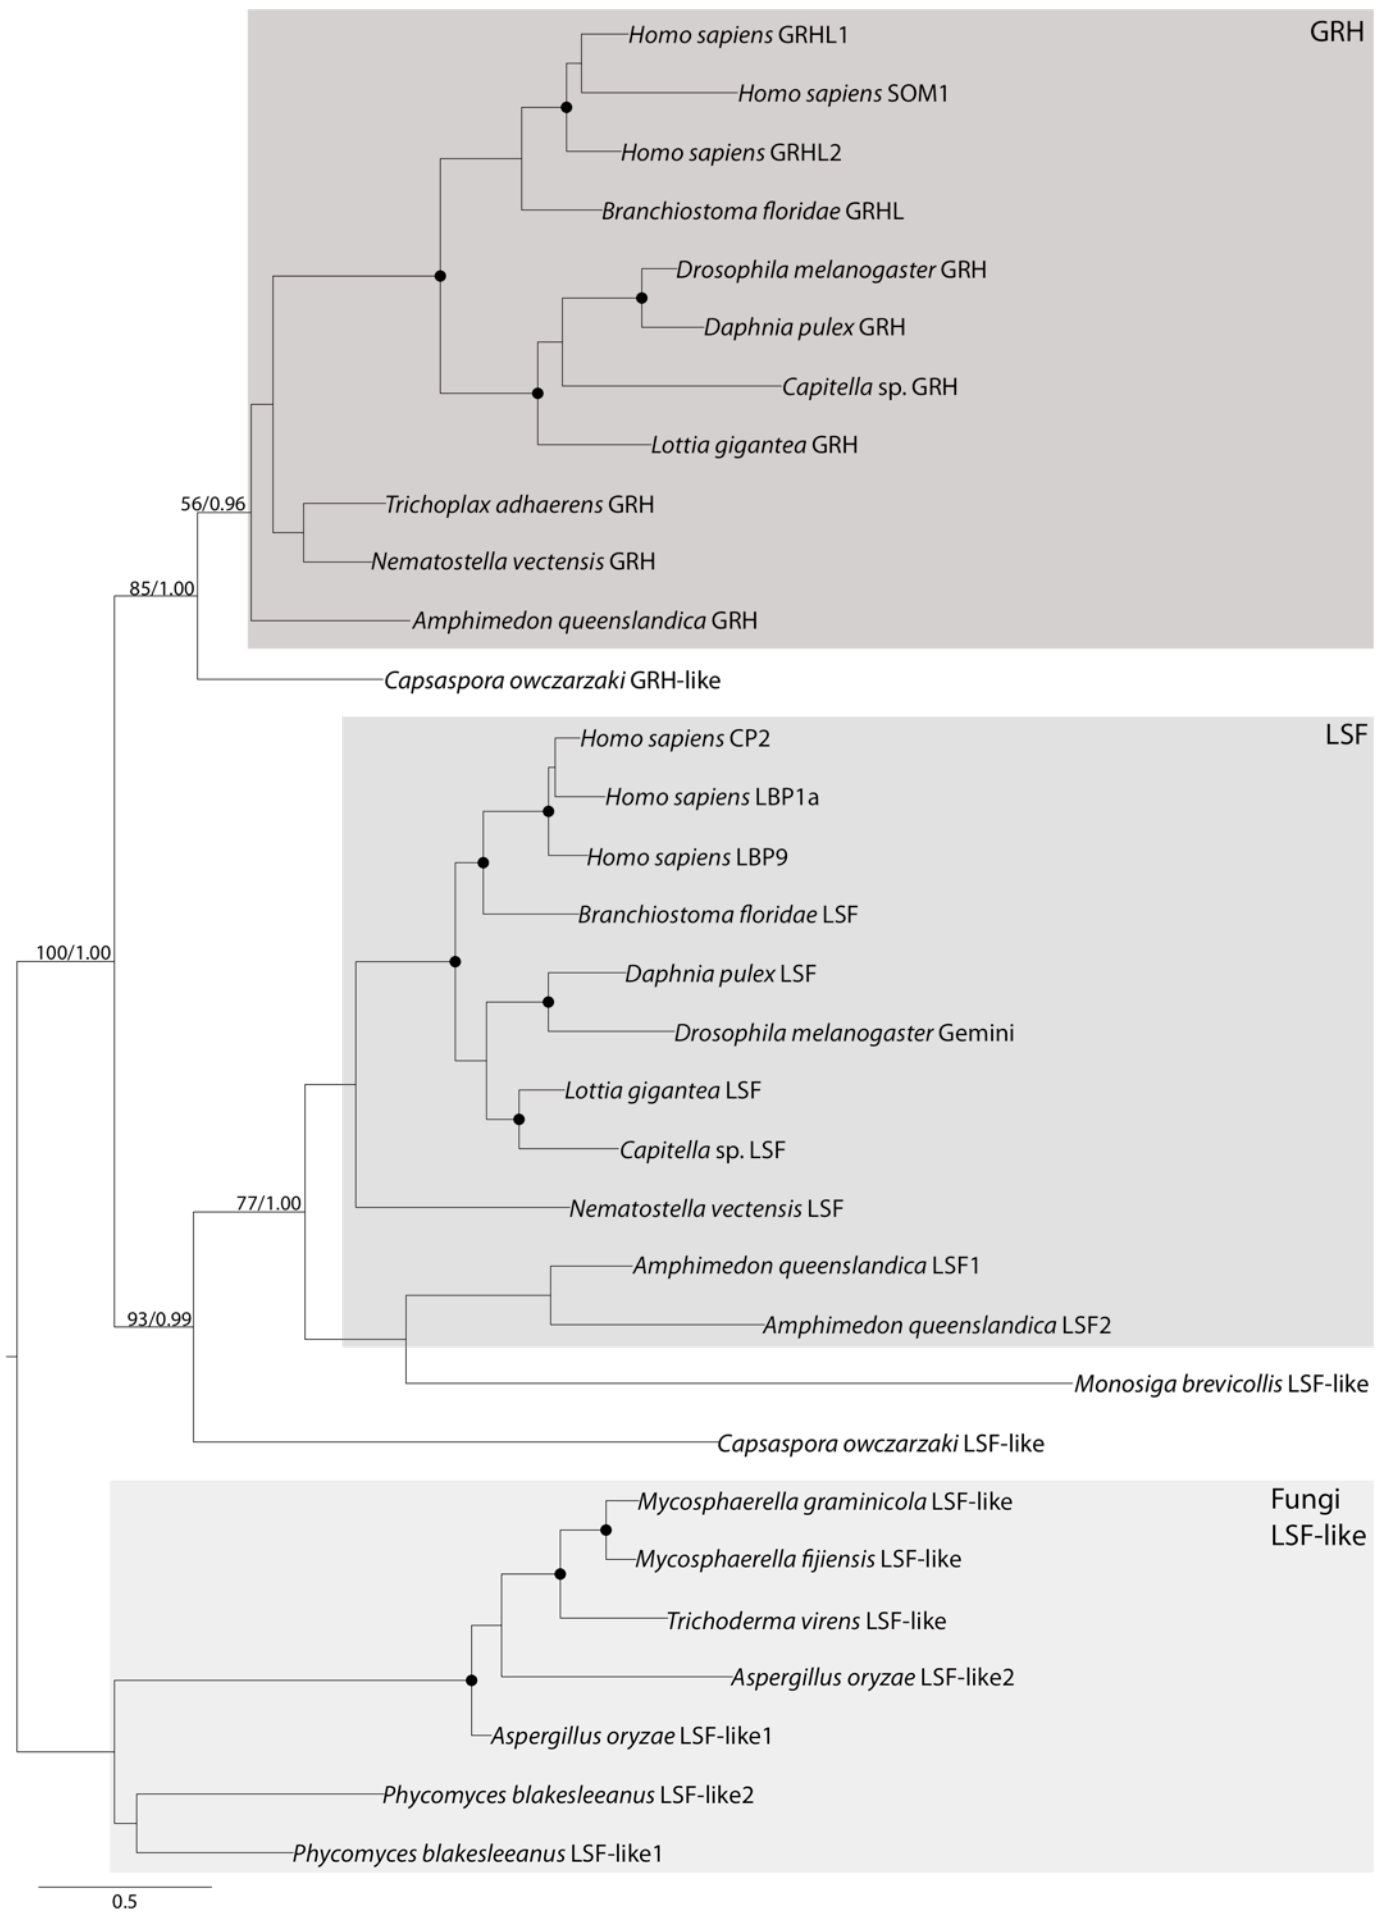

**Figure S23.** Maximum likelihood tree of CP2 domain containing genes. The tree is rooted using fungi. Statistical support was obtained by RAxML with 100-bootstrap replicates (BV) and Bayesian Posterior Probabilities (BPP). Both values are shown on key branches. A black dot indicates BV > 90% and BPP > 0.95.
